# Supplementary material for: Palladium-catalyzed bisthiolation of terminal alkynes for the assembly of diverse (Z)-1,2-bis(arylthio)alkene derivatives
Source: Royal Society of Chemistry journal article supplement (doi:10.1039/d1ra05773a), 2021-01-01

# Supporting Information

## Palladium-catalyzed bithiolation of terminal alkynes for the assembly of diverse (*Z*)-1,2-bis(arylthio)alkene derivatives

Yin-Long Lai,<sup>\*a</sup> Shaoxi Yan,<sup>a+</sup> Dan He,<sup>b+</sup> Li-Zhen Zhou,<sup>a</sup> Zi-Shen Chen,<sup>a</sup> Yu-Long Du<sup>a</sup> and

Jianxiao Li<sup>\*b, c</sup>

<sup>a</sup> College of Chemistry and Civil Engineering, Shaoguan University, Shaoguan, 512005, China.

*E-mail: chemlaiyinlong@163.com*

<sup>b</sup> Key Laboratory of Functional Molecular Engineering of Guangdong Province, School of Chemistry and

Chemical Engineering, South China University of Technology, Guangzhou 510640, China

*E-mail: cejxli@scut.edu.cn*

<sup>c</sup> Guangdong Provincial Key Laboratory of Luminescence from Molecular Aggregates, South China University of

Technology, Guangzhou 510640, China

## Table of Contents

|                                              |     |
|----------------------------------------------|-----|
| Materials and methods .....                  | S2  |
| Characterization data for all products ..... | S3  |
| NMR Spectra for the compounds <b>3</b> ..... | S17 |
| NMR Spectra for the compounds <b>4</b> ..... | S36 |

## Materials and methods

Melting points were measured using a melting point instrument and are uncorrected.  $^1\text{H}$  and  $^{13}\text{C}$  NMR spectra were recorded on a 400 MHz NMR spectrometer. The chemical shifts are referenced to signals at 7.24 and 77.0 ppm, respectively, and chloroform was used as a solvent with TMS as the internal standard. GC-MS data were obtained using electron ionization. HRMS was carried out on a high-resolution mass spectrometer (LCMS-IT-TOF). TLC was performed using commercially available 100–400 mesh silica gel plates (GF<sub>254</sub>). Unless otherwise noted, purchased chemicals were used without further purification.

### Typical procedure for the preparation of (*Z*)-1,2-bis(arylthio)alkenes

A mixture of IPr-Pd-Im-Cl<sub>2</sub> (0.650 mg, 0.5 mol %), ionic liquid [Bmim]PF<sub>6</sub> (2 mL), and H<sub>2</sub>O<sub>2</sub> (2 equiv) were added to an Schlenk tube equipped with a stir-bar. A balloon filled with N<sub>2</sub> was connected to the Schlenk tube *via* the side tube and purged 3 times. Then, alkyes (**1**, 0.2 mmol), and arylhydrazines (**2**, 0.48 mmol), and Na<sub>2</sub>S<sub>2</sub>O<sub>3</sub> (0.4 mmol) were quickly added to the tube under N<sub>2</sub> atmosphere and stirred at 120 °C for 12 h. After the reaction was finished, the N<sub>2</sub> gas was released carefully and the reaction was quenched by water and extracted with CH<sub>2</sub>Cl<sub>2</sub> three times. The combined organic layers were dried over anhydrous Na<sub>2</sub>SO<sub>4</sub> and evaporated under vacuum. The residue was purified by flash column chromatography on silica gel (hexanes/ethyl acetate) to afford the desired products **3** and **4**.

## Characterization data for all products

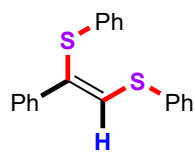

**(Z)-1-(1-Phenylethene-1,2-diyl)bis(phenylsulfane) (3a).**<sup>[1]</sup> Yield: 84%; <sup>1</sup>H NMR (400 MHz, CDCl<sub>3</sub>)  $\delta$  7.62 (d,  $J$  = 8.2 Hz, 2H), 7.56 (d,  $J$  = 8.2 Hz, 2H), 7.41 (t,  $J$  = 7.6 Hz, 2H), 7.37 (d,  $J$  = 7.0 Hz, 1H), 7.35 - 7.29 (m, 5H), 7.24 (dd,  $J$  = 10.4, 5.8 Hz, 3H), 7.14 (t,  $J$  = 7.2 Hz, 1H); <sup>13</sup>C NMR (100 MHz, CDCl<sub>3</sub>)  $\delta$  138.9, 136.7, 135.4, 134.8, 130.6, 129.5, 129.3, 128.9, 128.6, 128.3, 127.8, 127.6, 126.7, 125.9 ppm;  $\nu_{\max}$ (KBr)/cm<sup>-1</sup> 3048, 2932, 1560, 1477, 1432, 734; MS (EI)  $m/z$  77, 108, 178, 211, 277, 320; HRMS-ESI ( $m/z$ ): calcd for C<sub>20</sub>H<sub>16</sub>NaS<sub>2</sub>, [M+Na]<sup>+</sup>: 343.0586, found 343.0583.

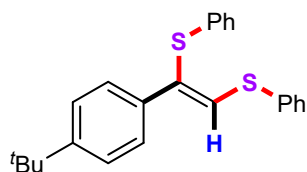

**(Z)-1-(4-(*tert*-Butyl)phenyl)ethene-1,2-diylbis(phenylsulfane) (3b).**<sup>[1]</sup> Yield: 90%; <sup>1</sup>H NMR (400 MHz, CDCl<sub>3</sub>)  $\delta$  7.48 (t,  $J$  = 8.4 Hz, 4H), 7.35 (t,  $J$  = 7.2 Hz, 2H), 7.28 (m, 6H), 7.21 (t,  $J$  = 7.6 Hz, 2H), 7.09 (t,  $J$  = 7.2 Hz, 1H), 1.26 (s, 9H); <sup>13</sup>C NMR (100 MHz, CDCl<sub>3</sub>)  $\delta$  150.9, 136.6, 136.2, 135.5, 135.2, 130.4, 129.3, 129.1, 128.9, 127.9, 127.5, 126.4, 125.8, 125.5, 34.7, 31.3 ppm;  $\nu_{\max}$ (KBr)/cm<sup>-1</sup> 3054, 2933, 1572, 1530, 1443, 1258, 742; MS (EI)  $m/z$  108, 211, 251, 319, 376; HRMS-ESI ( $m/z$ ): calcd for C<sub>24</sub>H<sub>24</sub>NaS<sub>2</sub>, [M+Na]<sup>+</sup>: 399.1212, found 399.1207.

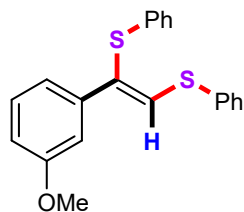

**(Z)-1-(3-Methoxyphenyl)ethene-1,2-diylbis(phenylsulfane) (3c).** <sup>[2]</sup> Yield: 92%; <sup>1</sup>H NMR (400 MHz, CDCl<sub>3</sub>) δ 7.50 (d, *J* = 7.8 Hz, 2H), 7.36 (d, *J* = 7.8 Hz, 2H), 7.32 (d, *J* = 7.0 Hz, 1H), 7.24 (d, *J* = 7.8 Hz, 3H), 7.20 - 7.14 (m, 4H), 7.13 - 7.07 (m, 2H), 6.73 (d, *J* = 7.2, 1H), 3.74 (s, 3H); <sup>13</sup>C NMR (100 MHz, CDCl<sub>3</sub>) δ 159.7, 140.3, 136.7, 135.2, 134.7, 130.5, 129.4, 129.3, 129.0, 128.8, 128.3, 127.5, 126.2, 119.3, 113.1, 112.7, 55.2 ppm;  $\nu_{\max}$ (KBr)/cm<sup>-1</sup> 3056, 2946, 1570, 1464, 1266, 753; MS (EI) *m/z* 77, 108, 226, 319, 350; HRMS-ESI (*m/z*): calcd for C<sub>21</sub>H<sub>18</sub>NaOS<sub>2</sub>, [M+Na]<sup>+</sup>: 373.0691, found 373.0685.

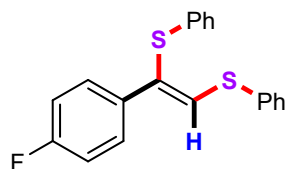

**(Z)-1-(4-Fluorophenyl)ethene-1,2-diylbis(phenylsulfane) (3d).** <sup>[1]</sup> Yield: 80%; <sup>1</sup>H NMR (400 MHz, CDCl<sub>3</sub>) δ 7.58 - 7.47 (m, 4H), 7.37 (t, *J* = 7.6 Hz, 2H), 7.32 (d, *J* = 7.6 Hz, 1H), 7.24 (d, *J* = 8.0 Hz, 2H), 7.18 (m, 3H), 7.10 (t, *J* = 7.2 Hz, 1H), 6.93 (t, *J* = 8.8 Hz, 2H); <sup>13</sup>C NMR (100 MHz, CDCl<sub>3</sub>) δ 162.5 (d, *J* = 247.7 Hz), 136.2 (d, *J* = 1.4 Hz), 135.1, 135.0 (d, *J* = 3.2 Hz), 134.4, 130.6, 129.4, 128.8, 128.6, 128.5, 128.2, 127.8, 126.2, 115.4 (d, *J* = 21.8 Hz) ppm;  $\nu_{\max}$ (KBr)/cm<sup>-1</sup> 3055, 2933, 1564, 1512, 1439, 746; MS (EI) *m/z* 77, 109, 229, 338; HRMS-ESI (*m/z*): calcd for C<sub>20</sub>H<sub>15</sub>FNaS<sub>2</sub>, [M+Na]<sup>+</sup>: 361.0491, found 361.0487.

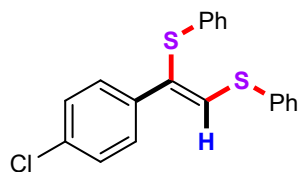

**(Z)-1-(4-Chlorophenyl)ethene-1,2-diylbis(phenylsulfane) (3e).**<sup>[2]</sup> Yield: 75%; <sup>1</sup>H NMR (400 MHz, CDCl<sub>3</sub>) δ 7.48 (m, 3H), 7.39 - 7.30 (m, 5H), 7.25 - 7.16 (m, 6H), 7.14 - 7.08 (m, 1H); <sup>13</sup>C NMR (100 MHz, CDCl<sub>3</sub>) δ 137.5, 137.2, 135.1, 134.2, 133.8, 133.6, 133.4, 130.7, 129.4, 129.1, 128.7, 128.5, 128.0, 126.2 ppm;  $\nu_{\max}(\text{KBr})/\text{cm}^{-1}$  3046, 2933, 1562, 1516, 1438, 744; MS (EI) m/z 109, 210, 245, 354; HRMS-ESI (m/z): calcd for C<sub>20</sub>H<sub>15</sub>ClNaS<sub>2</sub>, [M+Na]<sup>+</sup>: 377.0196, found 377.0192.

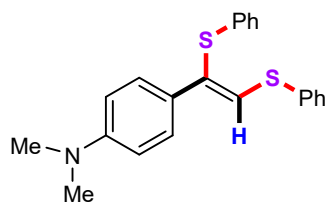

**(Z)-4-(1,2-Bis(phenylthio)vinyl)-N,N-dimethylaniline (3f).**<sup>[2]</sup> Yield: 70%; <sup>1</sup>H NMR (400 MHz, CDCl<sub>3</sub>) δ 7.48 (t, *J* = 7.0 Hz, 4H), 7.35 (t, *J* = 7.2 Hz, 2H), 7.27 (d, *J* = 8.2 Hz, 3H), 7.18 (t, *J* = 7.2 Hz, 2H), 7.11 - 7.05 (m, 2H), 6.60 (d, *J* = 8.0 Hz, 2H), 2.90 (s, 6H); <sup>13</sup>C NMR (100 MHz, CDCl<sub>3</sub>) δ 150.2, 136.1, 135.5, 131.7, 130.2, 130.0, 129.2, 128.8, 128.0, 127.8, 127.1, 126.8, 125.6, 112.2, 40.4 ppm;  $\nu_{\max}(\text{KBr})/\text{cm}^{-1}$  3052, 2936, 1556, 1504, 1443, 1256, 747; MS (EI) m/z 109, 144, 210, 254, 327, 363; HRMS-ESI (m/z): calcd for C<sub>22</sub>H<sub>21</sub>NNaS<sub>2</sub>, [M+Na]<sup>+</sup>: 386.1008, found 386.1005.

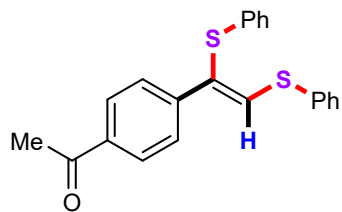

**(Z)-1-(4-(1,2-Bis(phenylthio)vinyl)phenyl)ethan-1-one (3g).**<sup>[2]</sup> Yield: 82%; <sup>1</sup>H NMR (400 MHz, CDCl<sub>3</sub>)  $\delta$  7.87 (d,  $J$  = 8.2 Hz, 2H), 7.68 (d,  $J$  = 8.2 Hz, 2H), 7.56 (d,  $J$  = 7.6 Hz, 2H), 7.48 - 7.37 (m, 4H), 7.29 (d,  $J$  = 4.8 Hz, 2H), 7.21 (t,  $J$  = 7.6 Hz, 2H), 7.15 (t,  $J$  = 7.2 Hz, 1H), 2.58 (s, 3H); <sup>13</sup>C NMR (100 MHz, CDCl<sub>3</sub>)  $\delta$  197.5, 143.0, 140.2, 135.8, 134.6, 134.2, 130.8, 129.4, 129.1, 128.7, 128.4, 128.0, 127.9, 126.6, 126.2, 26.6 ppm;  $\nu_{\max}$ (KBr)/cm<sup>-1</sup> 3044, 2932, 1690, 1566, 1472, 1416, 1264, 748; MS (EI)  $m/z$  86, 117, 207, 321, 362; HRMS-ESI ( $m/z$ ): calcd for C<sub>22</sub>H<sub>19</sub>OS<sub>2</sub>, [M+H]<sup>+</sup>: 363.0872, found 363.0866.

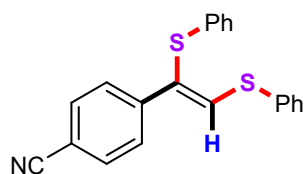

**(Z)-4-(1,2-Bis(phenylthio)vinyl)benzonitrile (3h).**<sup>[2]</sup> Yield: 70%; <sup>1</sup>H NMR (400 MHz, CDCl<sub>3</sub>)  $\delta$  7.65 (d,  $J$  = 8.4 Hz, 1H), 7.52 (t,  $J$  = 6.8 Hz, 4H), 7.43 - 7.35 (m, 5H), 7.25 - 7.17 (m, 2H), 7.15 (t,  $J$  = 7.2 Hz, 1H), 6.72 (t,  $J$  = 7.6 Hz, 2H); <sup>13</sup>C NMR (100 MHz, CDCl<sub>3</sub>)  $\delta$  147.8, 143.2, 141.3, 132.2, 132.1, 131.4, 131.1, 129.7, 129.5, 129.1, 128.3, 127.1, 118.0, 114.3, 108.0 ppm;  $\nu_{\max}$ (KBr)/cm<sup>-1</sup> 3049, 2940, 2223, 1556, 1436, 1414, 744; MS (EI)  $m/z$  103, 133, 207, 281, 345; HRMS-ESI ( $m/z$ ): calcd for C<sub>21</sub>H<sub>16</sub>NS<sub>2</sub>, [M+H]<sup>+</sup>: 346.0719, found 346.0714.

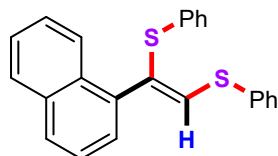

**(Z)-1-(1-(Naphthalen-1-yl)ethene-1,2-diyl)bis(phenylsulfane) (3i).** Yield: 86%;  $^1\text{H}$  NMR (400 MHz,  $\text{CDCl}_3$ )  $\delta$  8.04 (s, 1H), 7.82 - 7.74 (m, 2H), 7.72 (d,  $J = 10.2$  Hz, 2H), 7.53 (d,  $J = 8.2$  Hz, 2H), 7.43 (m, 3H), 7.36 (d,  $J = 8.2$  Hz, 3H), 7.32 (t,  $J = 7.6$  Hz, 2H), 7.18 (t,  $J = 7.6$  Hz, 2H), 7.06 (d,  $J = 7.2$  Hz, 1H);  $^{13}\text{C}$  NMR (100 MHz,  $\text{CDCl}_3$ )  $\delta$  137.6, 136.3, 135.2, 134.7, 133.4, 132.7, 130.6, 130.0, 129.5, 129.3, 129.0, 128.4, 128.2, 127.8, 127.6, 126.4, 126.1, 126.1, 126.0, 124.6 ppm;  $\nu_{\text{max}}(\text{KBr})/\text{cm}^{-1}$  3048, 2934, 1622, 1566, 1472, 1429, 745; MS (EI)  $m/z$  109, 228, 261, 325, 370; HRMS-ESI ( $m/z$ ): calcd for  $\text{C}_{24}\text{H}_{18}\text{NaS}_2$ ,  $[\text{M}+\text{Na}]^+$ : 393.0742, found 393.0738.

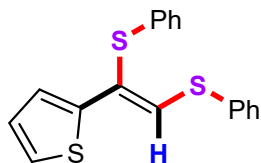

**(Z)-2-(1,2-Bis(phenylthio)vinyl)thiophene (3j).** Yield: 73%;  $^1\text{H}$  NMR (400 MHz,  $\text{CDCl}_3$ )  $\delta$  7.50 (d,  $J = 7.2$  Hz, 2H), 7.43 - 7.34 (m, 3H), 7.30 (t,  $J = 8.2$  Hz, 4H), 7.25 - 7.18 (m, 4H), 7.12 (t,  $J = 7.2$  Hz, 1H);  $^{13}\text{C}$  NMR (100 MHz,  $\text{CDCl}_3$ )  $\delta$  140.8, 136.2, 135.2, 134.8, 130.6, 129.3, 129.0, 127.8, 127.5, 126.1, 125.8, 125.6, 124.2, 122.2 ppm;  $\nu_{\text{max}}(\text{KBr})/\text{cm}^{-1}$  3040, 2933, 1626, 1566, 1472, 1416, 754; MS (EI)  $m/z$  65, 109, 217, 260, 326; HRMS-ESI ( $m/z$ ): calcd for  $\text{C}_{18}\text{H}_{14}\text{NaS}_3$ ,  $[\text{M}+\text{Na}]^+$ : 349.0150, found 349.0144.

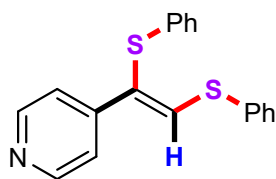

**(Z)-4-(1,2-Bis(phenylthio)vinyl)pyridine (3k).** Yield: 65%;  $^1\text{H}$  NMR (400 MHz,  $\text{CDCl}_3$ )  $\delta$  8.78 (s, 1H), 8.42 (d,  $J = 4.8$  Hz, 1H), 7.83 (d,  $J = 8.2$  Hz, 1H), 7.52 (d,  $J = 7.6$  Hz, 2H), 7.39 (t,  $J = 7.2$  Hz, 2H), 7.35 (d,  $J = 7.2$  Hz, 1H), 7.30 (s, 1H), 7.24 (d,  $J = 7.0$  Hz, 2H), 7.20 (t,  $J = 7.6$  Hz, 2H), 7.18 - 7.10 (m, 2H);  $^{13}\text{C}$  NMR (100 MHz,  $\text{CDCl}_3$ )  $\delta$  148.5, 147.7, 138.3, 134.6, 134.0, 133.6, 130.7, 129.3, 129.2, 129.1, 128.9, 127.8, 126.6, 126.2, 123.1 ppm;  $\nu_{\text{max}}(\text{KBr})/\text{cm}^{-1}$  3048, 2942, 1558, 1510, 1456, 1407, 748; MS (EI)  $m/z$  96, 191, 207, 281, 321; HRMS-ESI ( $m/z$ ): calcd for  $\text{C}_{19}\text{H}_{16}\text{NS}_2$ ,  $[\text{M}+\text{H}]^+$ : 322.0719, found 322.0715.

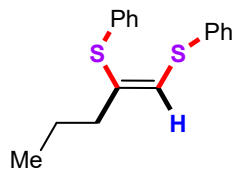

**(Z)-Pent-1-ene-1,2-diylbis(phenylsulfane) (3l).**<sup>[1]</sup> Yield: 91%;  $^1\text{H}$  NMR (400 MHz,  $\text{CDCl}_3$ )  $\delta$  7.44 (d,  $J = 7.6$  Hz, 2H), 7.39 (d,  $J = 8.0$  Hz, 2H), 7.35 (d,  $J = 7.2$  Hz, 2H), 7.30 (t,  $J = 5.8$  Hz, 2H), 7.24 - 7.18 (m, 2H), 6.58 (s, 1H), 2.24 (t,  $J = 7.2$  Hz, 2H), 1.59 - 1.49 (m, 2H), 0.86 (t,  $J = 7.2$  Hz, 3H);  $^{13}\text{C}$  NMR (100 MHz,  $\text{CDCl}_3$ )  $\delta$  135.8, 134.0, 130.6, 129.7, 129.4, 129.1, 128.8, 128.7, 126.8, 126.7, 39.2, 21.8, 13.4 ppm;  $\nu_{\text{max}}(\text{KBr})/\text{cm}^{-1}$  3056, 2938, 1545, 1426, 1268, 1020, 744; MS (EI)  $m/z$  65, 91, 109, 135, 167, 286; HRMS-ESI ( $m/z$ ): calcd for  $\text{C}_{17}\text{H}_{18}\text{NaS}_2$ ,  $[\text{M}+\text{Na}]^+$ : 309.0742, found 309.0738.



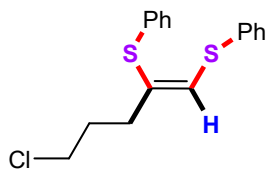

**(Z)-(5-Chloropent-1-ene-1,2-diyl)bis(phenylsulfane) (3m).**<sup>[2]</sup> Yield: 93%; <sup>1</sup>H NMR (400 MHz, CDCl<sub>3</sub>)  $\delta$  7.45 (d,  $J$  = 8.0 Hz, 2H), 7.39 (d,  $J$  = 8.0 Hz, 3H), 7.36 - 7.29 (m, 4H), 7.25 (t,  $J$  = 5.2 Hz, 1H), 6.68 (s, 1H), 3.49 (t,  $J$  = 6.8 Hz, 2H), 2.44 (t,  $J$  = 7.2 Hz, 2H), 1.96 (t,  $J$  = 6.8 Hz, 2H); <sup>13</sup>C NMR (100 MHz, CDCl<sub>3</sub>)  $\delta$  135.5, 133.3, 131.6, 131.5, 130.6, 130.0, 129.3, 129.1, 127.2, 127.0, 44.1, 33.8, 31.0 ppm;  $\nu_{\max}$ (KBr)/cm<sup>-1</sup> 3056, 2924, 1568, 1466, 1432, 1270, 1025, 745; MS (EI)  $m/z$  65, 109, 167, 285, 320; HRMS-ESI ( $m/z$ ): calcd for C<sub>17</sub>H<sub>17</sub>ClNaS<sub>2</sub>, [M+Na]<sup>+</sup>: 343.0352, found 343.0348.

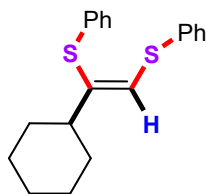

**(Z)-(1-Cyclohexylethene-1,2-diyl)bis(phenylsulfane) (3n).**<sup>[2]</sup> Yield: 82%; <sup>1</sup>H NMR (400 MHz, CDCl<sub>3</sub>)  $\delta$  7.42 (d,  $J$  = 7.6 Hz, 2H), 7.33 (d,  $J$  = 4.8 Hz, 3H), 7.29 (d,  $J$  = 7.6 Hz, 3H), 7.25 (d,  $J$  = 7.0 Hz, 1H), 7.19 (t,  $J$  = 6.8 Hz, 1H), 6.72 (s, 1H), 2.15 (t,  $J$  = 10.2 Hz, 1H), 1.94 (d,  $J$  = 11.2 Hz, 2H), 1.74 (d,  $J$  = 11.2 Hz, 2H), 1.30 - 1.25 (m, 3H), 1.22 - 1.14 (m, 3H); <sup>13</sup>C NMR (100 MHz, CDCl<sub>3</sub>)  $\delta$  137.1, 135.2, 133.8, 132.1, 130.2, 129.1, 128.8, 128.5, 127.0, 125.8, 46.2, 32.8, 26.4, 26.1 ppm;  $\nu_{\max}$ (KBr)/cm<sup>-1</sup> 3058, 2927, 1565, 1466, 1415, 1268, 1058, 746; MS (EI)  $m/z$  79, 91, 109, 167, 217, 326; HRMS-ESI ( $m/z$ ): calcd for C<sub>20</sub>H<sub>22</sub>NaS<sub>2</sub>, [M+Na]<sup>+</sup>: 349.1055, found 349.1052.

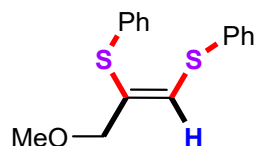

**(Z)-(3-Methoxyprop-1-ene-1,2-diyl)bis(phenylsulfane) (3o).**<sup>[2]</sup> Yield: 84%; <sup>1</sup>H NMR (400 MHz, CDCl<sub>3</sub>)  $\delta$  7.47 (d,  $J$  = 8.0 Hz, 2H), 7.42 (d,  $J$  = 8.0 Hz, 2H), 7.39 - 7.30 (m, 5H), 7.25-7.20 (m, 1H), 7.00 (s, 1H), 3.96 (s, 2H), 3.30 (s, 3H); <sup>13</sup>C NMR (100 MHz, CDCl<sub>3</sub>)  $\delta$  135.2, 134.5, 133.4, 130.3, 130.1, 129.2, 129.0, 127.4, 127.2, 126.8, 74.5, 58.1 ppm;  $\nu_{\max}(\text{KBr})/\text{cm}^{-1}$  3052, 2923, 1567, 1475, 1426, 1268, 1116, 748; MS (EI)  $m/z$  69, 109, 177, 243, 288; HRMS-ESI ( $m/z$ ): calcd for C<sub>16</sub>H<sub>17</sub>OS<sub>2</sub>, [M+H]<sup>+</sup>: 289.0715, found 289.0712.

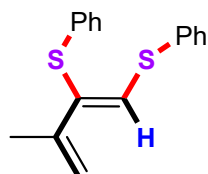

**(Z)-(3-Methylbuta-1,3-diene-1,2-diyl)bis(phenylsulfane) (3p).**<sup>[2]</sup> Yield: 91%; <sup>1</sup>H NMR (400 MHz, CDCl<sub>3</sub>)  $\delta$  7.48 (d,  $J$  = 7.2 Hz, 2H), 7.40 - 7.29 (m, 3H), 7.25 - 7.20 (m, 4H), 7.19 - 7.12 (m, 2H), 5.51 (s, 1H), 4.98 (s, 1H), 2.00 (s, 3H); <sup>13</sup>C NMR (100 MHz, CDCl<sub>3</sub>)  $\delta$  140.2, 138.6, 135.6, 135.1, 130.4, 129.6, 129.2, 128.8, 127.6, 127.3, 125.5, 115.5, 20.9 ppm;  $\nu_{\max}(\text{KBr})/\text{cm}^{-1}$  3048, 2926, 1665, 1576, 1457, 1419, 1268, 1015, 749; MS (EI)  $m/z$  65, 91, 109, 175, 207, 251, 284; HRMS-ESI ( $m/z$ ): calcd for C<sub>17</sub>H<sub>17</sub>S<sub>2</sub>, [M+H]<sup>+</sup>: 285.0766, found 285.0763.

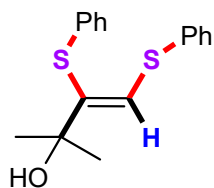

**(Z)-2-Methyl-3,4-bis(phenylthio)but-3-en-2-ol (3q).**<sup>[1]</sup> Yield: 72%; <sup>1</sup>H NMR (400 MHz, CDCl<sub>3</sub>)

$\delta$  7.43 (d,  $J = 7.2$  Hz, 2H), 7.41 - 7.36 (m, 6H), 7.35 - 7.29 (m, 2H), 7.18 (t,  $J = 7.2$  Hz, 1H), 2.17

(s, 1H), 1.46 (s, 6H); <sup>13</sup>C NMR (100 MHz, CDCl<sub>3</sub>)  $\delta$  137.8, 135.0, 134.8, 134.8, 130.6, 129.3,

129.2, 127.5, 127.1, 125.8, 75.1, 29.4 ppm;  $\nu_{\max}(\text{KBr})/\text{cm}^{-1}$  3050, 2932, 1576, 1466, 1414, 1268,

1024, 750; MS (EI)  $m/z$  59, 91, 134, 177, 207, 287, 302; HRMS-ESI ( $m/z$ ): calcd for C<sub>17</sub>H<sub>19</sub>OS<sub>2</sub>,

[M+H]<sup>+</sup>: 303.0872, found 303.0868.

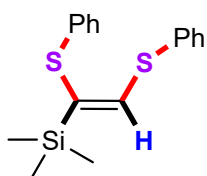

**(Z)-(1,2-Bis(phenylthio)vinyl)trimethylsilane (3r).**<sup>[3]</sup> Yield: 76%; <sup>1</sup>H NMR (400 MHz, CDCl<sub>3</sub>)

$\delta$  7.40 (d,  $J = 7.6$  Hz, 2H), 7.37 - 7.29 (m, 5H), 7.25 - 7.20 (m, 3H), 7.19 (d,  $J = 7.2$  Hz, 1H), 0.01

(s, 9H); <sup>13</sup>C NMR (100 MHz, CDCl<sub>3</sub>)  $\delta$  149.8, 134.8, 134.7, 132.0, 130.4, 129.8, 129.7, 129.6,

129.5, 128.6, 0.00 ppm;  $\nu_{\max}(\text{KBr})/\text{cm}^{-1}$  3058, 2940, 1578, 1506, 1472, 1266, 747; MS (EI)  $m/z$  91,

109, 186, 262, 316; HRMS-ESI ( $m/z$ ): calcd for C<sub>17</sub>H<sub>20</sub>NaOS<sub>2</sub>Si, [M+Na]<sup>+</sup>: 339.0668, found

339.0664.

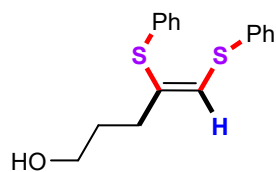

**(Z)-4,5-Bis(phenylthio)pent-4-en-1-ol (3s).** Yield: 83%;  $^1\text{H}$  NMR (400 MHz,  $\text{CDCl}_3$ )  $\delta$  7.44 (d,  $J$  = 8.0 Hz, 2H), 7.39 (d,  $J$  = 8.0 Hz, 2H), 7.34 (d, 8.0 Hz, 4H), 7.25 - 7.20 (m, 2H), 6.63 (s, 1H), 3.60 (t,  $J$  = 6.4 Hz, 2H), 2.38 (t,  $J$  = 7.6 Hz, 2H), 1.84 - 1.73 (m, 2H), 1.41 (s, 1H);  $^{13}\text{C}$  NMR (100 MHz,  $\text{CDCl}_3$ )  $\delta$  135.8, 133.4, 132.8, 130.5, 130.4, 129.8, 129.2, 129.1, 127.0, 126.8, 61.7, 33.3, 31.5 ppm;  $\nu_{\text{max}}(\text{KBr})/\text{cm}^{-1}$  3360, 2938, 1580, 1475, 1419, 1028, 748; MS (EI)  $m/z$  91, 109, 167, 277, 302; HRMS-ESI ( $m/z$ ): calcd for  $\text{C}_{17}\text{H}_{19}\text{OS}_2$ ,  $[\text{M}+\text{H}]^+$ : 303.0872, found 303.0867.

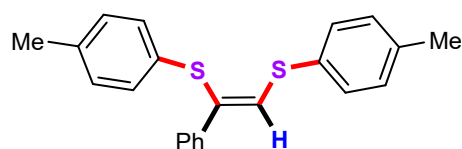

**(Z)-(1-Phenylethene-1,2-diyl)bis(*p*-tolylsulfane) (4a).** <sup>[1]</sup> Yield: 87%;  $^1\text{H}$  NMR (400 MHz,  $\text{CDCl}_3$ )  $\delta$  7.60 (d,  $J$  = 8.0 Hz, 2H), 7.46 (d,  $J$  = 8.0 Hz, 2H), 7.35 - 7.29 (m, 2H), 7.24 - 7.15 (m, 6H), 7.05 (d,  $J$  = 8.0 Hz, 2H), 2.40 (s, 3H), 2.29 (s, 3H);  $^{13}\text{C}$  NMR (100 MHz,  $\text{CDCl}_3$ )  $\delta$  138.8, 137.7, 136.8, 135.7, 131.7, 131.1, 131.0, 130.0, 129.6, 129.2, 128.5, 128.4, 127.5, 126.6, 21.2, 21.0 ppm;  $\nu_{\text{max}}(\text{KBr})/\text{cm}^{-1}$  3058, 2929, 1538, 1466, 1418, 1268, 756; MS (EI)  $m/z$  165, 210, 281, 348; HRMS-ESI ( $m/z$ ): calcd for  $\text{C}_{22}\text{H}_{20}\text{NaS}_2$ ,  $[\text{M}+\text{Na}]^+$ : 371.0899, found 371.0896.

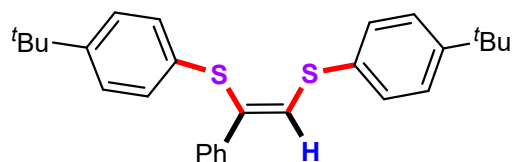

**(Z)-(1-Phenylethene-1,2-diyl)bis((4-(*tert*-butyl)phenyl)sulfane) (4b).** <sup>[2]</sup> Yield: 90%; <sup>1</sup>H NMR (400 MHz, CDCl<sub>3</sub>) δ 7.58 (d, *J* = 7.6 Hz, 2H), 7.46 (d, *J* = 8.2 Hz, 2H), 7.40 (d, *J* = 8.2 Hz, 2H), 7.25 (d, *J* = 5.6 Hz, 3H), 7.23 (d, *J* = 5.6 Hz, 1H), 7.19 (t, *J* = 7.6 Hz, 4H), 1.34 (s, 9H), 1.25 (s, 9H); <sup>13</sup>C NMR (100 MHz, CDCl<sub>3</sub>) δ 151.1, 149.0, 139.2, 137.7, 131.7, 131.3, 130.7, 128.4, 128.4, 127.6, 127.4, 126.6, 126.5, 126.2, 34.7, 34.5, 31.3, 31.2 ppm;  $\nu_{\max}(\text{KBr})/\text{cm}^{-1}$  3054, 2939, 1593, 1528, 1476, 1262, 1114, 756; MS (EI) *m/z* 121, 207, 268, 387, 432; HRMS-ESI (*m/z*): calcd for C<sub>28</sub>H<sub>33</sub>S<sub>2</sub>, [M+H]<sup>+</sup>: 433.2018, found 433.2014.

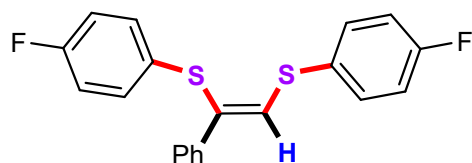

**(Z)-(1-Phenylethene-1,2-diyl)bis((4-fluorophenyl)sulfane) (4c).** <sup>[2]</sup> Yield: 81%; <sup>1</sup>H NMR (400 MHz, CDCl<sub>3</sub>) δ 7.50 (t, *J* = 7.0 Hz, 4H), 7.25 - 7.18 (m, 5H), 7.14 - 7.05 (m, 3H), 6.90 (t, *J* = 8.4 Hz, 2H); <sup>13</sup>C NMR (100 MHz, CDCl<sub>3</sub>) δ 162.7 (d, *J* = 248.7 Hz), 161.8 (d, *J* = 246.3 Hz), 138.4, 135.8, 133.2 (d, *J* = 8.4 Hz), 130.8 (d, *J* = 8.1 Hz), 130.2, 130.1 (d, *J* = 3.8 Hz), 129.6 (d, *J* = 3.5 Hz), 128.5, 127.7, 126.8, 116.6 (d, *J* = 22.3 Hz), 116.4 (d, *J* = 22.2 Hz) ppm;  $\nu_{\max}(\text{KBr})/\text{cm}^{-1}$  3045, 2932, 1578, 1486, 1413, 1226, 826; MS (EI) *m/z* 127, 165, 294, 356; HRMS-ESI (*m/z*): calcd for C<sub>20</sub>H<sub>15</sub>F<sub>2</sub>S<sub>2</sub>, [M+H]<sup>+</sup>: 357.0578, found 357.0573.

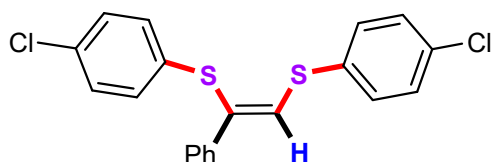

**(Z)-(1-Phenylethene-1,2-diyl)bis((4-chlorophenyl)sulfane) (4d).**<sup>[2]</sup> Yield: 82%; <sup>1</sup>H NMR (400 MHz, CDCl<sub>3</sub>)  $\delta$  7.53 (d,  $J$  = 7.6 Hz, 2H), 7.42 (d,  $J$  = 8.2 Hz, 2H), 7.34 (d,  $J$  = 8.2 Hz, 2H), 7.24 (d,  $J$  = 7.2 Hz, 3H), 7.19 - 7.09 (m, 5H); <sup>13</sup>C NMR (100 MHz, CDCl<sub>3</sub>)  $\delta$  138.2, 135.7, 133.8, 133.5, 133.1, 132.0, 131.8, 129.8, 129.6, 129.5, 129.1, 128.5, 128.0, 126.7 ppm;  $\nu_{\max}$ (KBr)/cm<sup>-1</sup> 3044, 2928, 1536, 1476, 1423, 756; MS (EI)  $m/z$  108, 165, 245, 338, 388; HRMS-ESI ( $m/z$ ): calcd for C<sub>20</sub>H<sub>15</sub>Cl<sub>2</sub>S<sub>2</sub>, [M+H]<sup>+</sup>: 388.9987, found 388.9983.

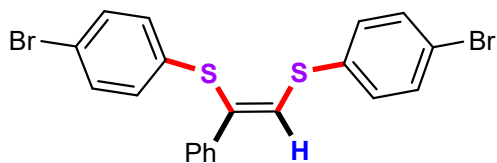

**(Z)-(1-Phenylethene-1,2-diyl)bis((4-bromophenyl)sulfane) (4e).**<sup>[2]</sup> Yield: 75%; <sup>1</sup>H NMR (400 MHz, CDCl<sub>3</sub>)  $\delta$  7.53 (d,  $J$  = 7.6 Hz, 2H), 7.44 (d,  $J$  = 8.2 Hz, 2H), 7.35 (d,  $J$  = 8.2 Hz, 2H), 7.29 (d,  $J$  = 5.2 Hz, 1H), 7.25 - 7.20 (m, 2H), 7.19 - 7.08 (m, 5H); <sup>13</sup>C NMR (100 MHz, CDCl<sub>3</sub>)  $\delta$  138.3, 135.7, 133.8, 133.4, 133.1, 132.0, 131.8, 129.8, 129.7, 129.5, 129.1, 128.7, 128.0, 126.7 ppm;  $\nu_{\max}$ (KBr)/cm<sup>-1</sup> 3046, 2932, 1569, 1477, 1418, 754; MS (EI)  $m/z$  96, 208, 398, 476; HRMS-ESI ( $m/z$ ): calcd for C<sub>20</sub>H<sub>15</sub>Br<sub>2</sub>S<sub>2</sub>, [M+H]<sup>+</sup>: 476.8976, found 476.8972.

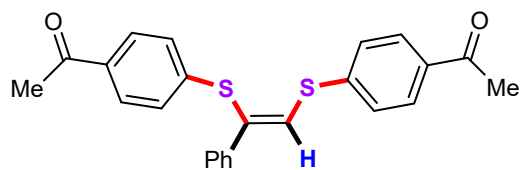

**(Z)-1,1'-(((1-Phenylethene-1,2-diyl)bis(sulfanediyl))bis(4,1-phenylene))bis(ethan-1-one) (4f).**

[2] Yield: 71%;  $^1\text{H}$  NMR (400 MHz,  $\text{CDCl}_3$ )  $\delta$  7.95 (d,  $J = 8.4$  Hz, 2H), 7.78 (d,  $J = 8.4$  Hz, 2H), 7.60 (d,  $J = 7.2$  Hz, 2H), 7.54 (d,  $J = 8.4$  Hz, 2H), 7.39 (s, 1H), 7.34 - 7.28 (m, 3H), 7.25 - 7.20 (m, 2H), 2.59 (s, 3H), 2.52 (s, 3H);  $^{13}\text{C}$  NMR (100 MHz,  $\text{CDCl}_3$ )  $\delta$  197.3, 197.2, 141.6, 141.5, 138.1, 135.6, 134.8, 134.5, 130.2, 129.2, 129.0, 128.8, 128.7, 128.4, 127.1, 126.6, 26.7, 26.5 ppm;  $\nu_{\text{max}}(\text{KBr})/\text{cm}^{-1}$  3047, 2926, 1668, 1576, 1486, 1415, 1263, 1089, 756; MS (EI)  $m/z$  96, 207, 281, 380, 404; HRMS-ESI ( $m/z$ ): calcd for  $\text{C}_{24}\text{H}_{21}\text{O}_2\text{S}_2$ ,  $[\text{M}+\text{H}]^+$ : 405.0977, found 405.0972.

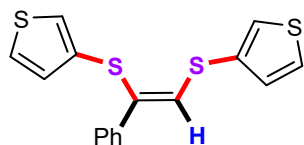

**(Z)-3,3'-(((1-Phenylethene-1,2-diyl)bis(sulfanediyl))dithiophene) (4g).** Yield: 66%;  $^1\text{H}$  NMR (400 MHz,  $\text{CDCl}_3$ )  $\delta$  7.48 (d,  $J = 7.6$  Hz, 2H), 7.39 (d,  $J = 5.2$  Hz, 1H), 7.24 (d,  $J = 5.6$  Hz, 4H), 7.19 (d,  $J = 5.6$  Hz, 1H), 7.08 (d,  $J = 3.6$  Hz, 1H), 7.02 (dd,  $J = 5.4, 3.8$  Hz, 1H), 6.82 (dd,  $J = 5.4, 3.8$  Hz, 1H), 6.79 (s, 1H);  $^{13}\text{C}$  NMR (100 MHz,  $\text{CDCl}_3$ )  $\delta$  138.1, 135.8, 133.6, 133.0, 132.7, 131.7, 131.5, 130.0, 129.1, 128.2, 127.8, 127.7, 127.3, 127.2 ppm;  $\nu_{\text{max}}(\text{KBr})/\text{cm}^{-1}$  3046, 2928, 1548, 1456, 1417, 757; MS (EI)  $m/z$  71, 115, 217, 277, 332; HRMS-ESI ( $m/z$ ): calcd for  $\text{C}_{16}\text{H}_{12}\text{NaS}_4$ ,  $[\text{M}+\text{Na}]^+$ : 354.9714, found 354.9710.

## References

1. J. Chen, S. Chen, X. Xu, Z. Tang, C.-T. Au and R. Qiu, *J. Org. Chem.*, 2016, **81**, 3246-3255.
2. J. Li, C. Li, L. Ouyang, C. Li, S. Yang, W. Wu and H. Jiang, *Adv. Synth. Catal.*, 2018, **360**, 1138-1150.
3. K. B. Zou, X. H. Yin, W. Q. Liu, R. H. Qiu, R. X. Li, L. L. Shao, Y. H. Li, X. Hua Xu, and R. H. Yang, *Synthetic Commun.*, 2009, **39**, 2464-2471.



### $^1\text{H}$ and $^{13}\text{C}$ NMR spectra of compounds 3

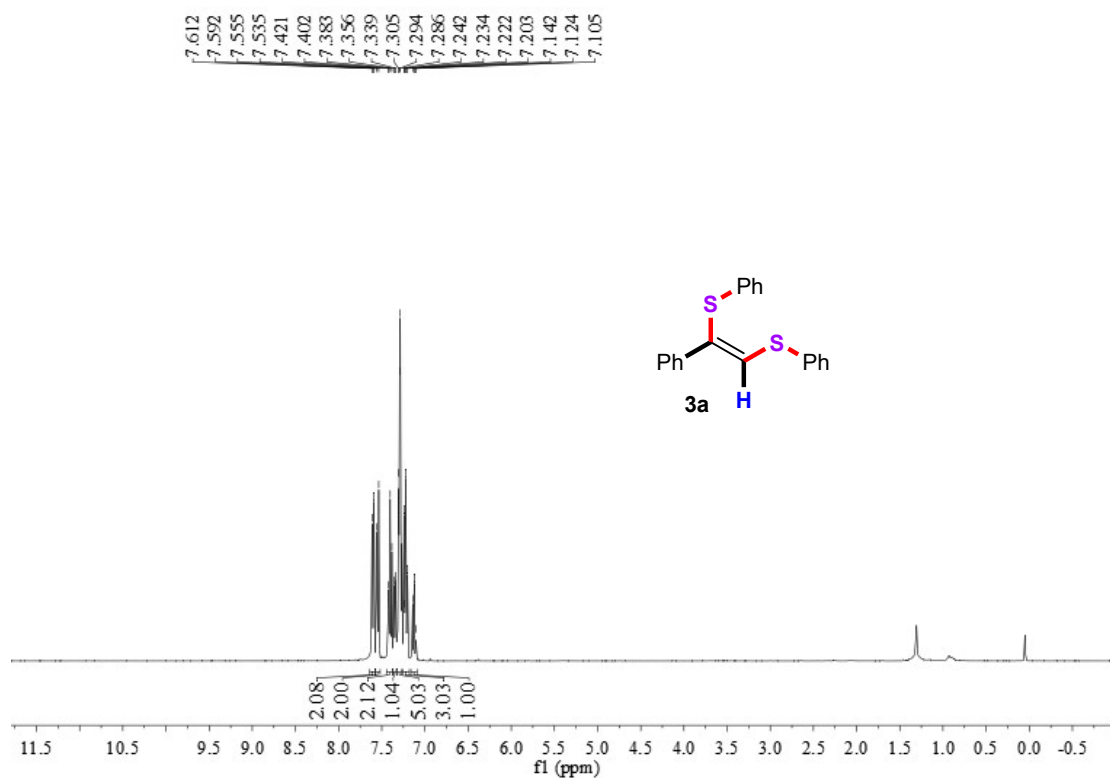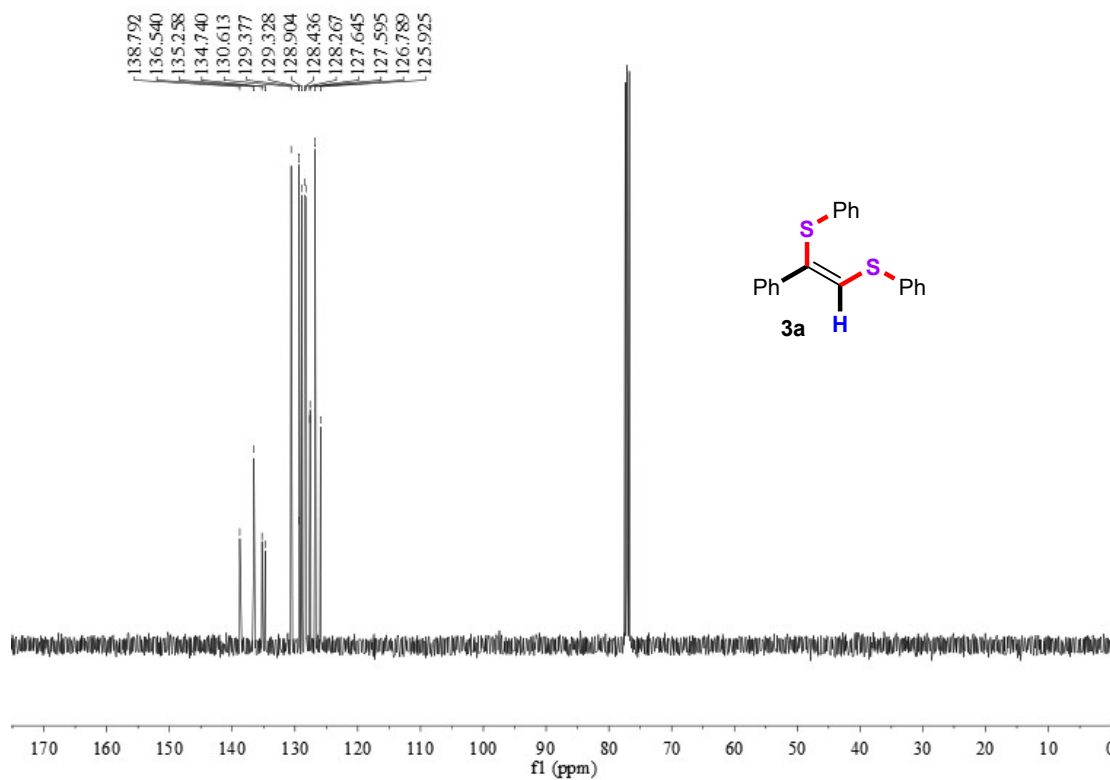

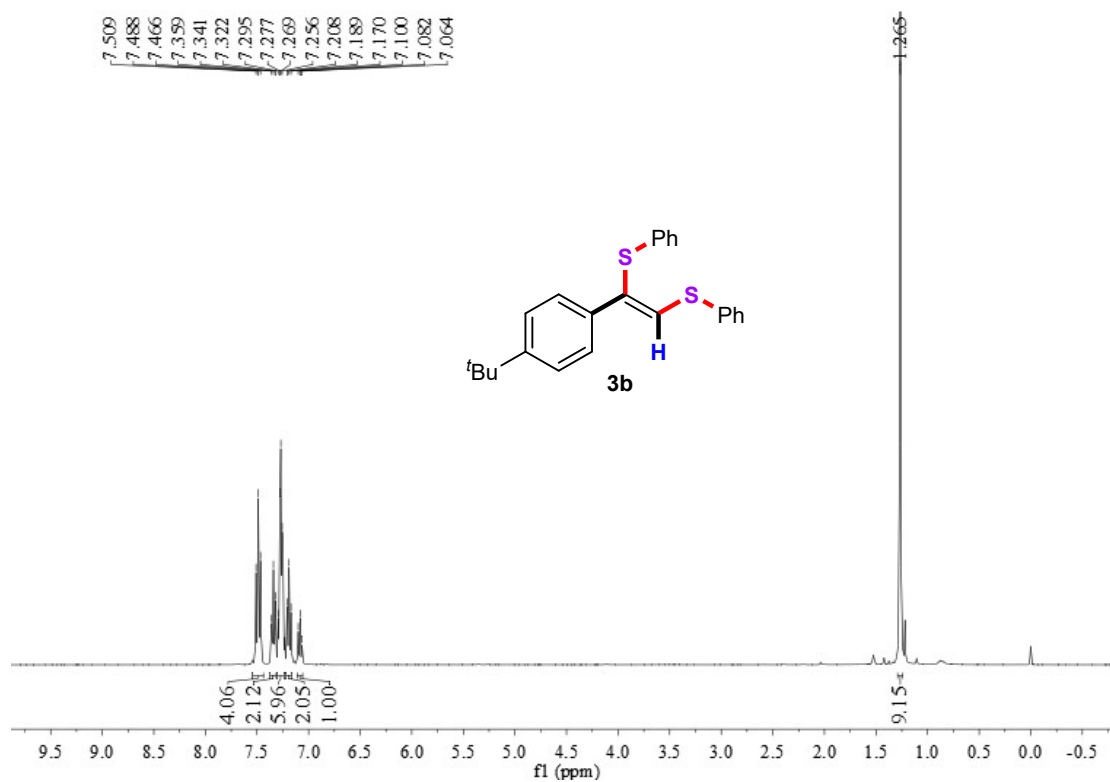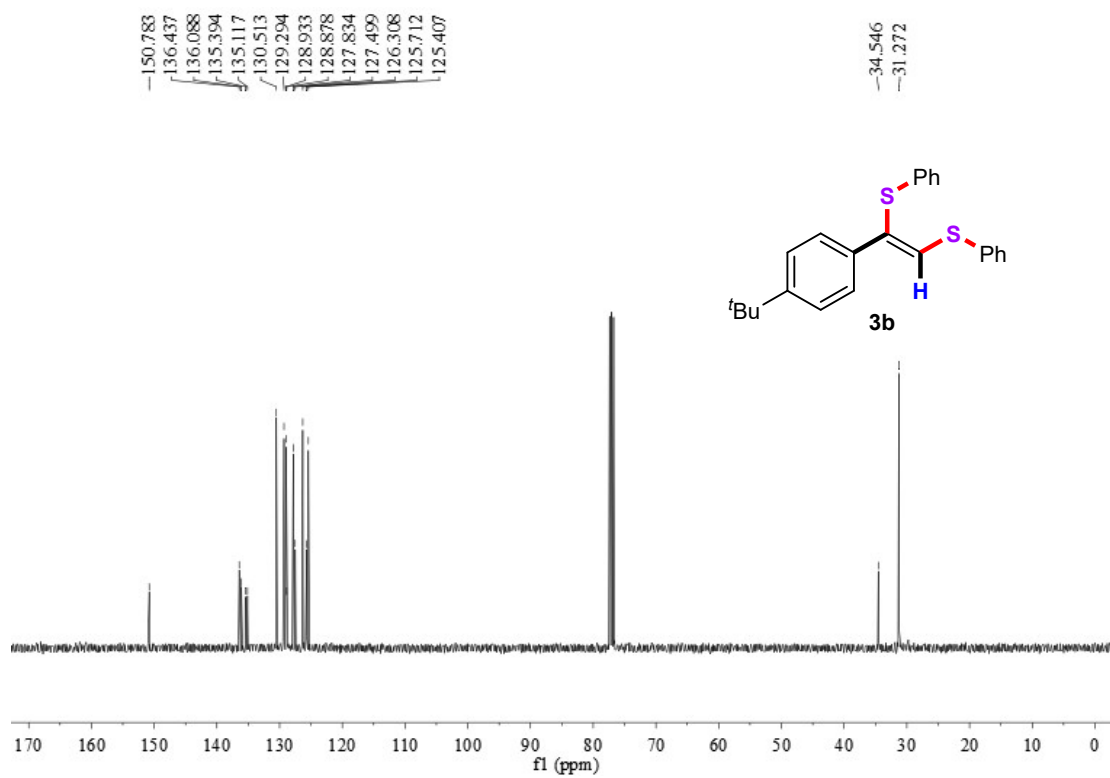

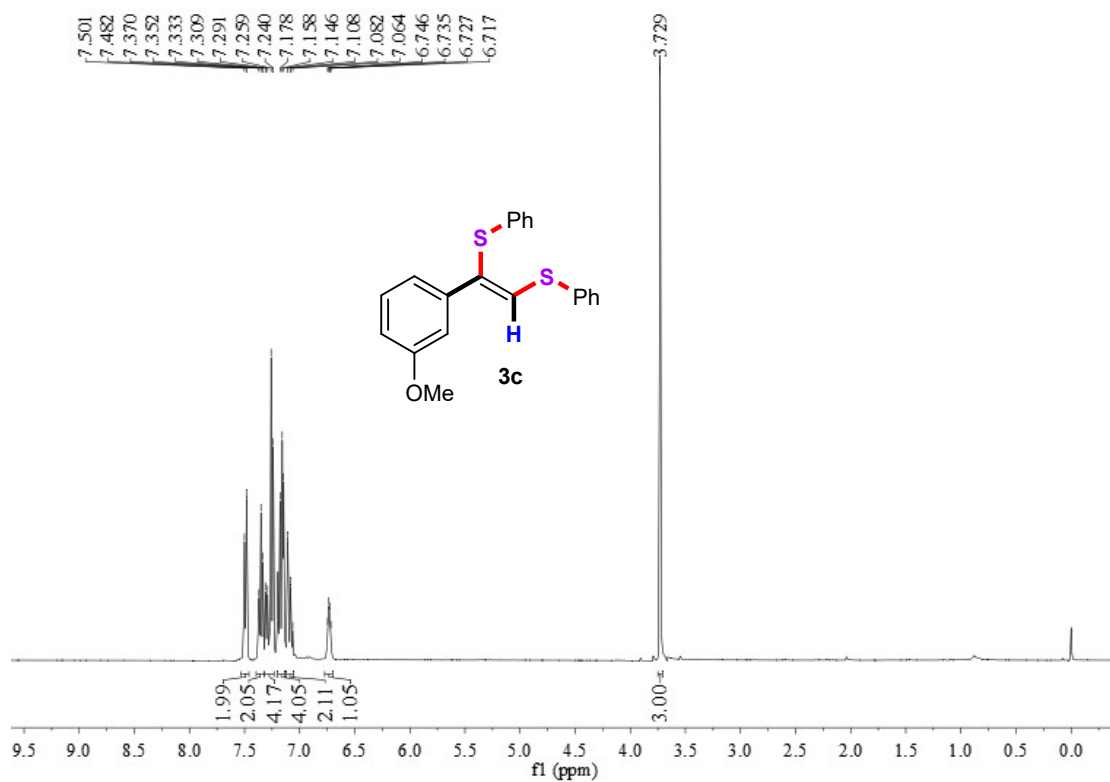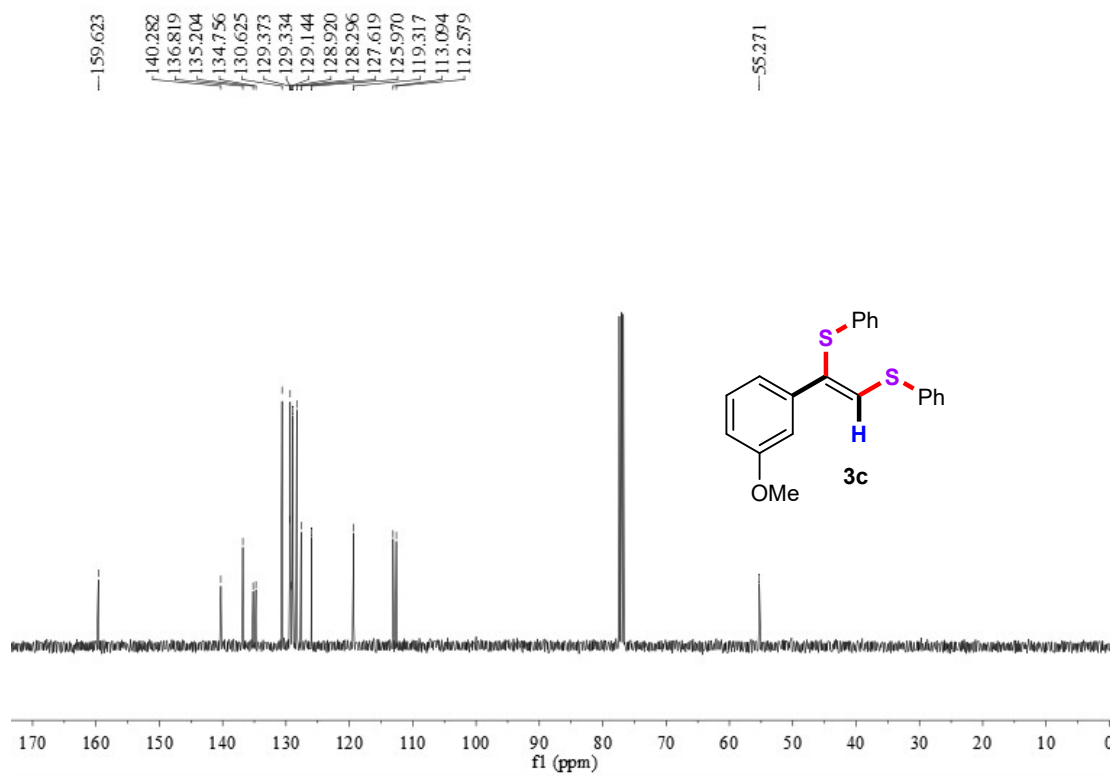

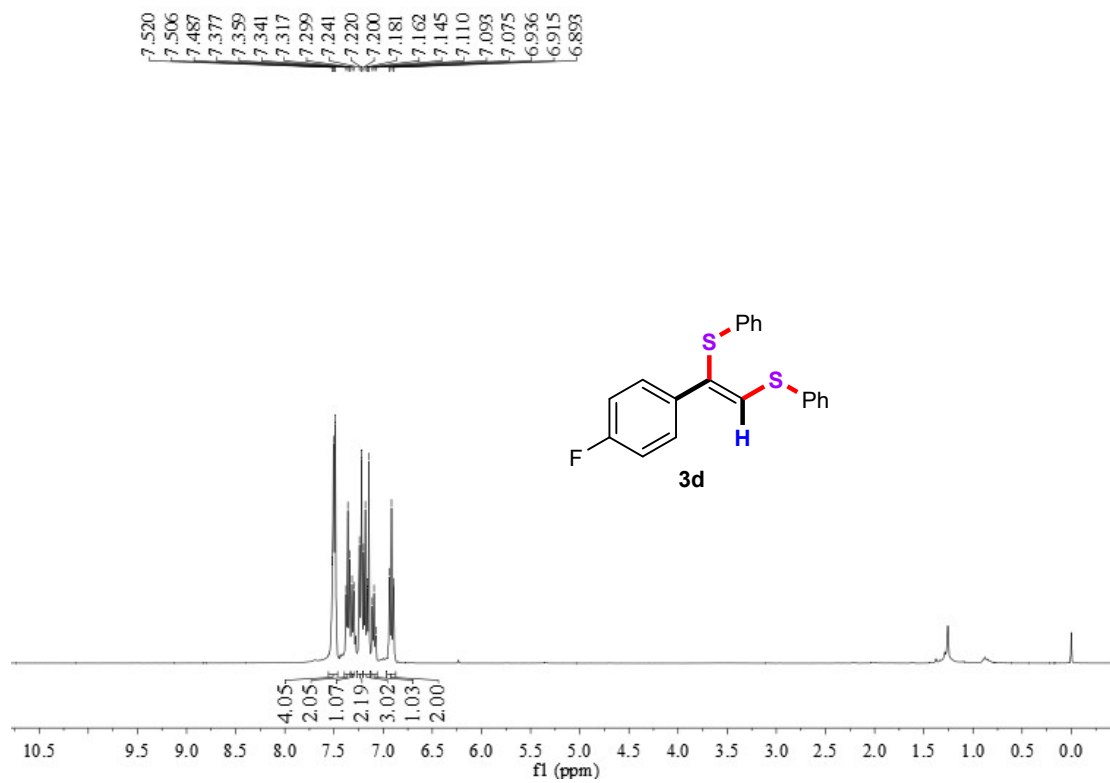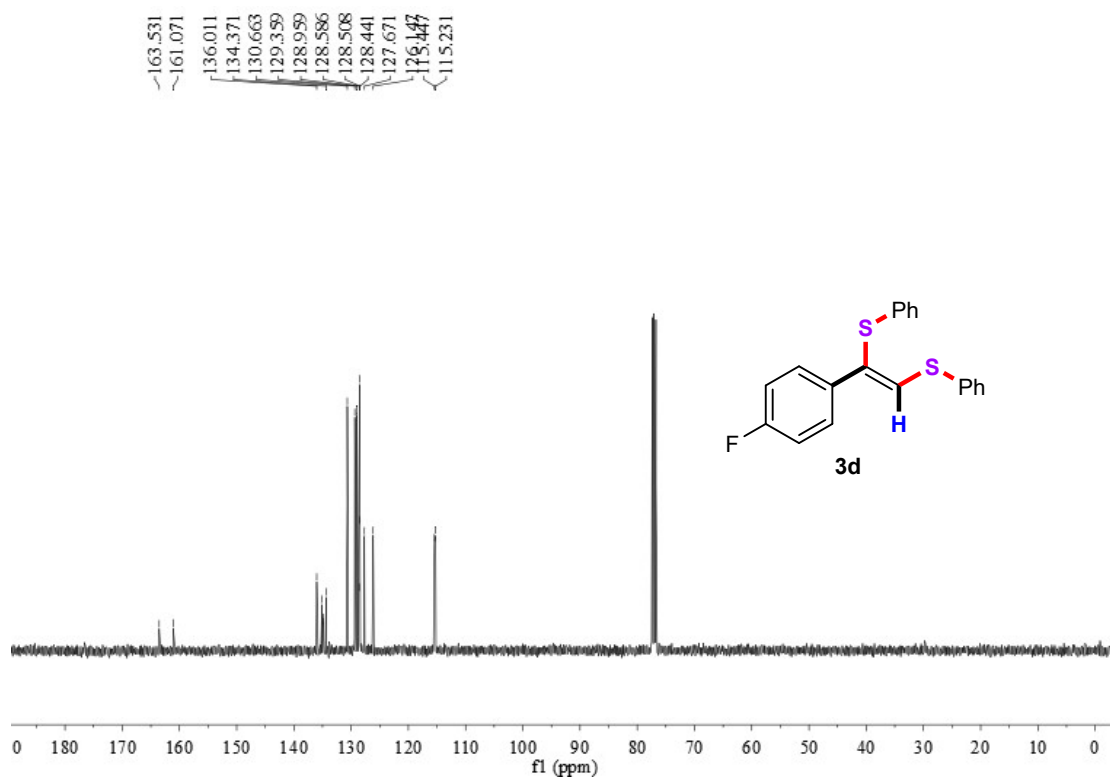

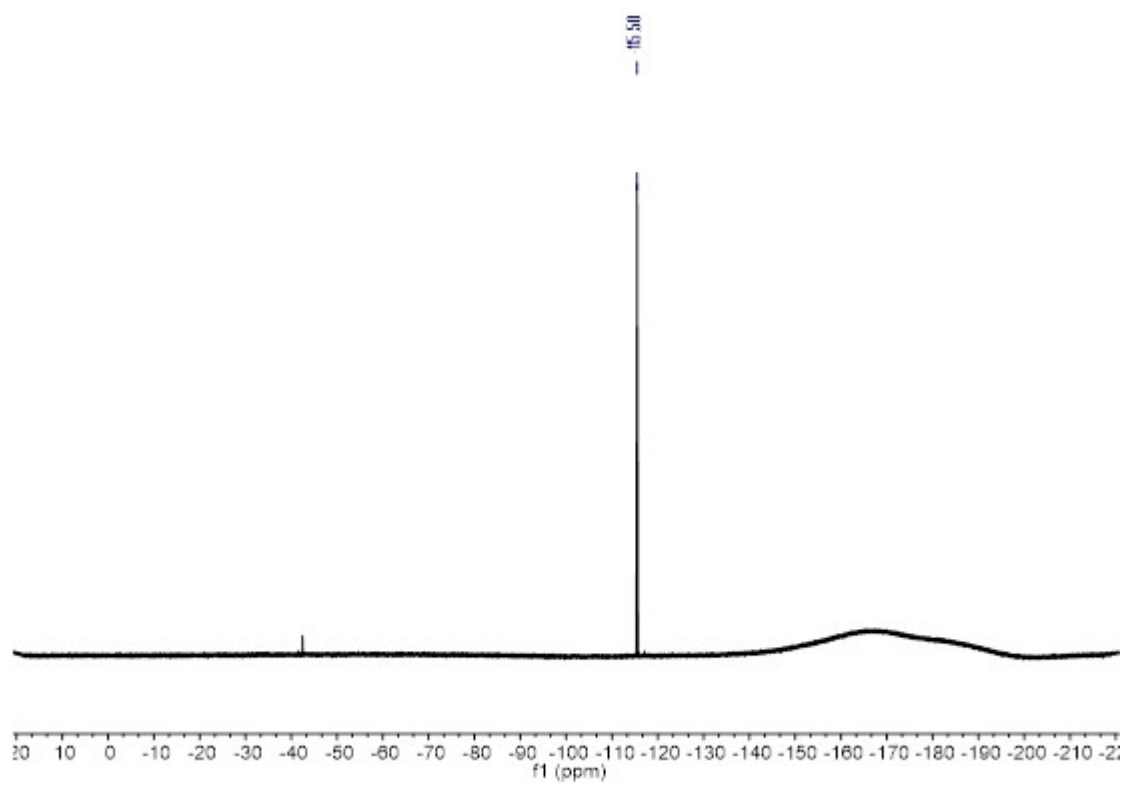

7.499  
7.496  
7.478  
7.475  
7.469  
7.452  
7.363  
7.350  
7.346  
7.331  
7.317  
7.311  
7.293  
7.229  
7.213  
7.193  
7.187  
7.173  
7.154  
7.100  
7.091  
7.086  
7.072  
7.068  
7.065

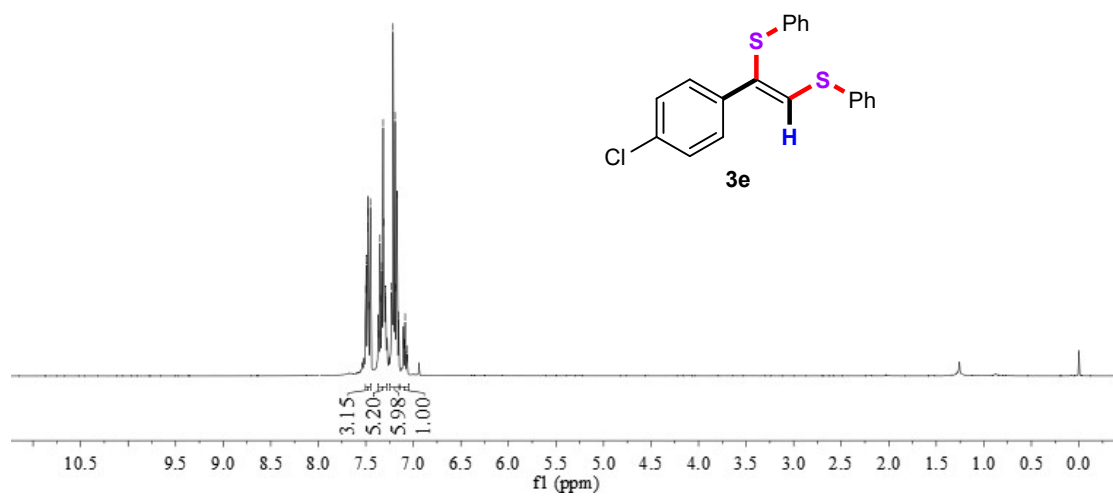

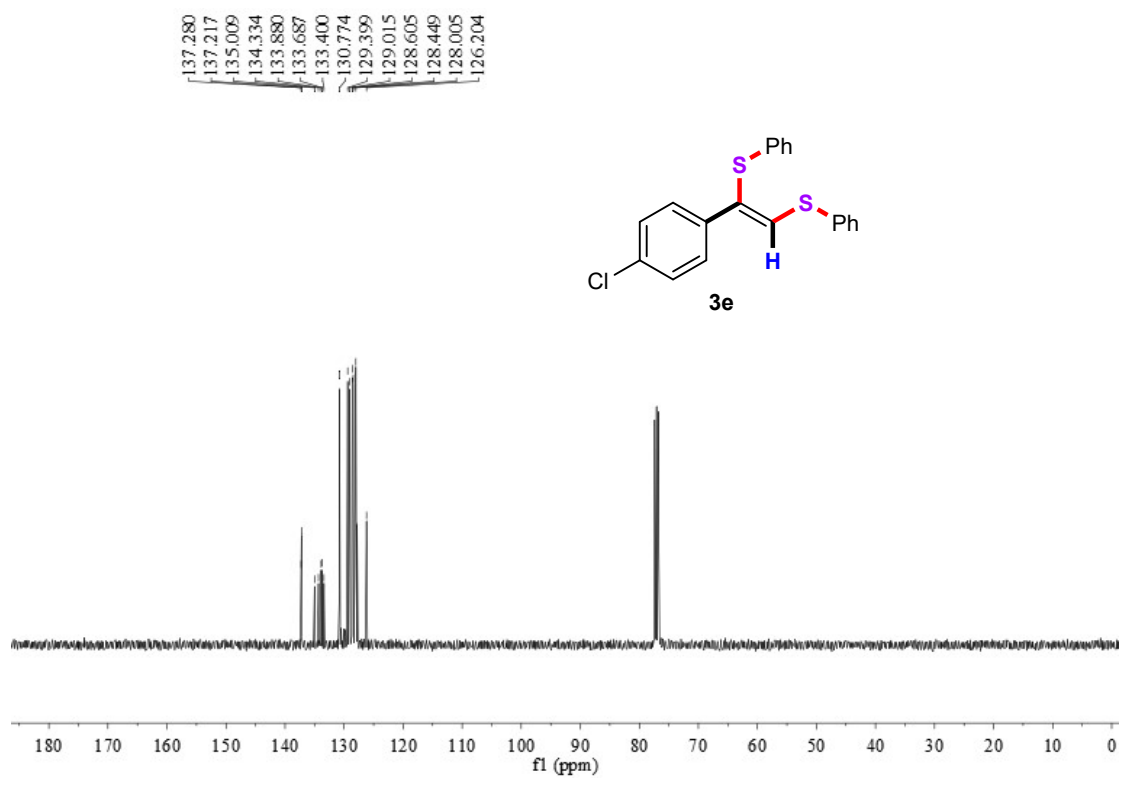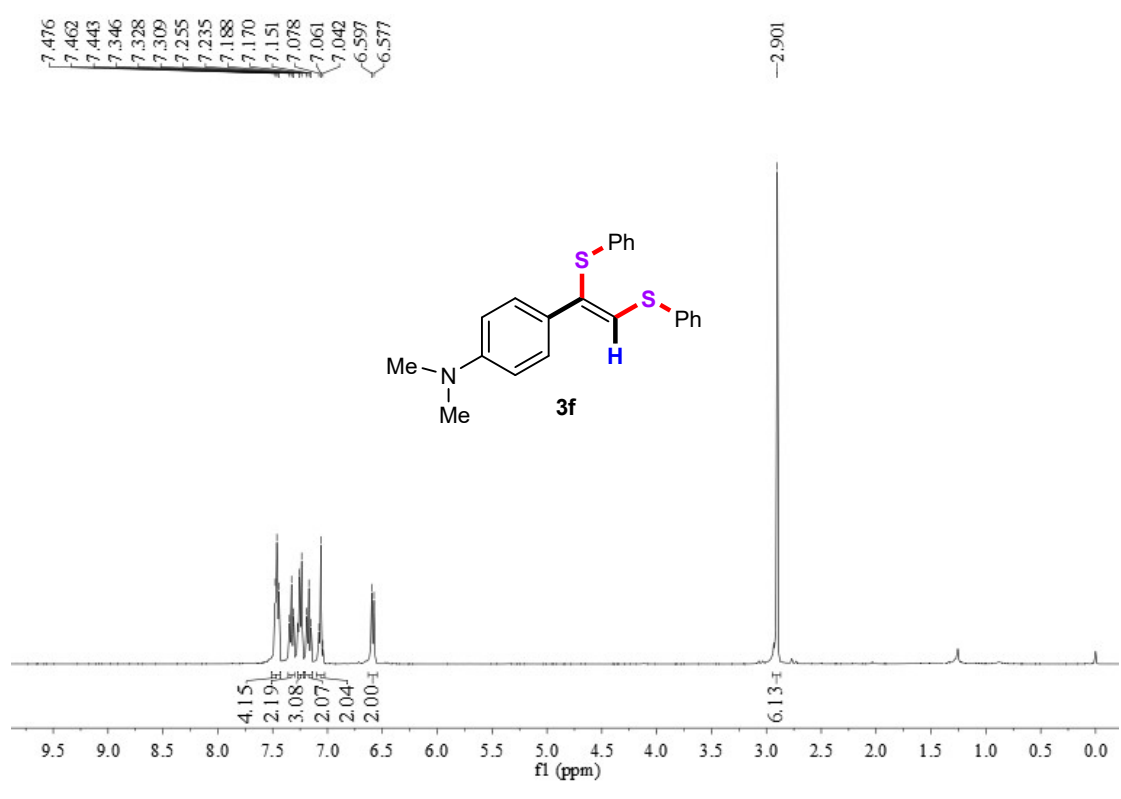

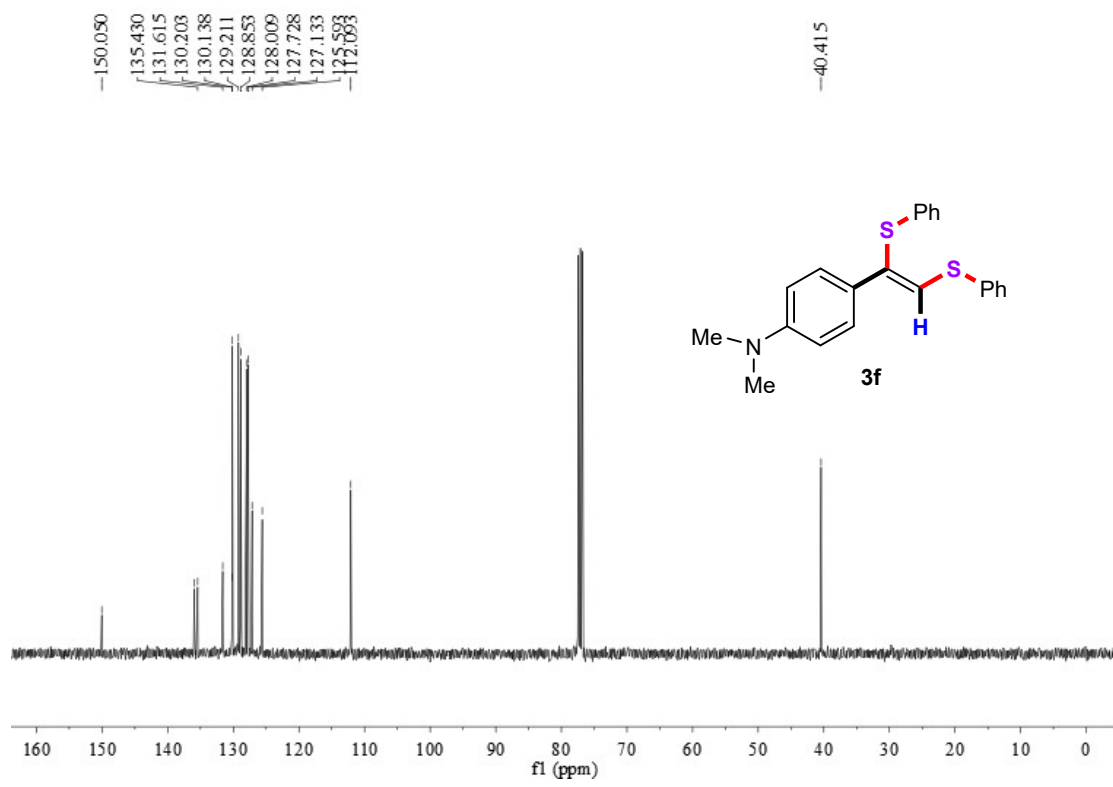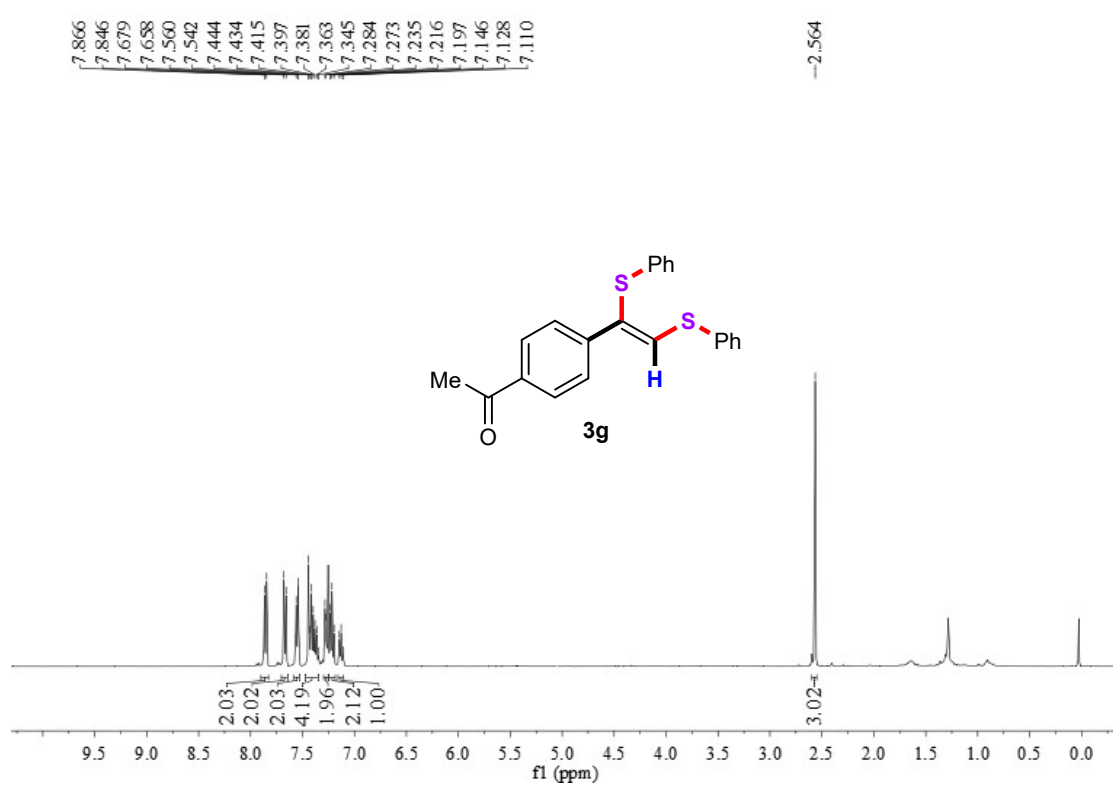

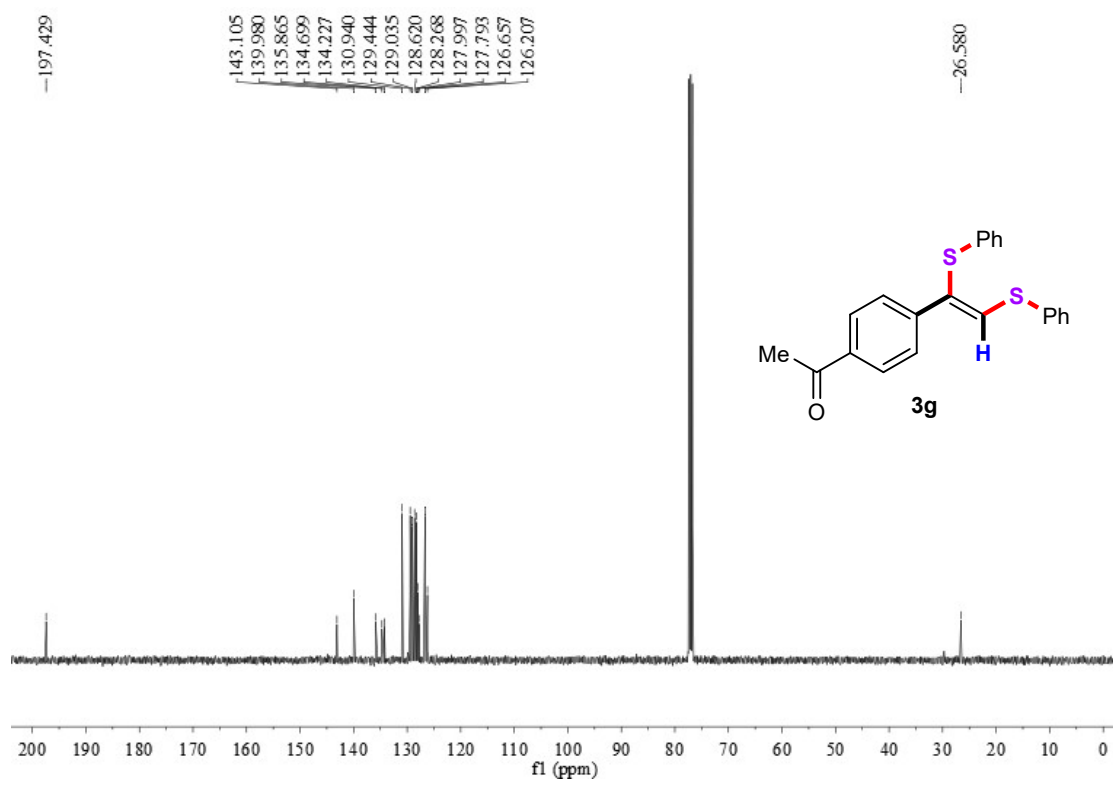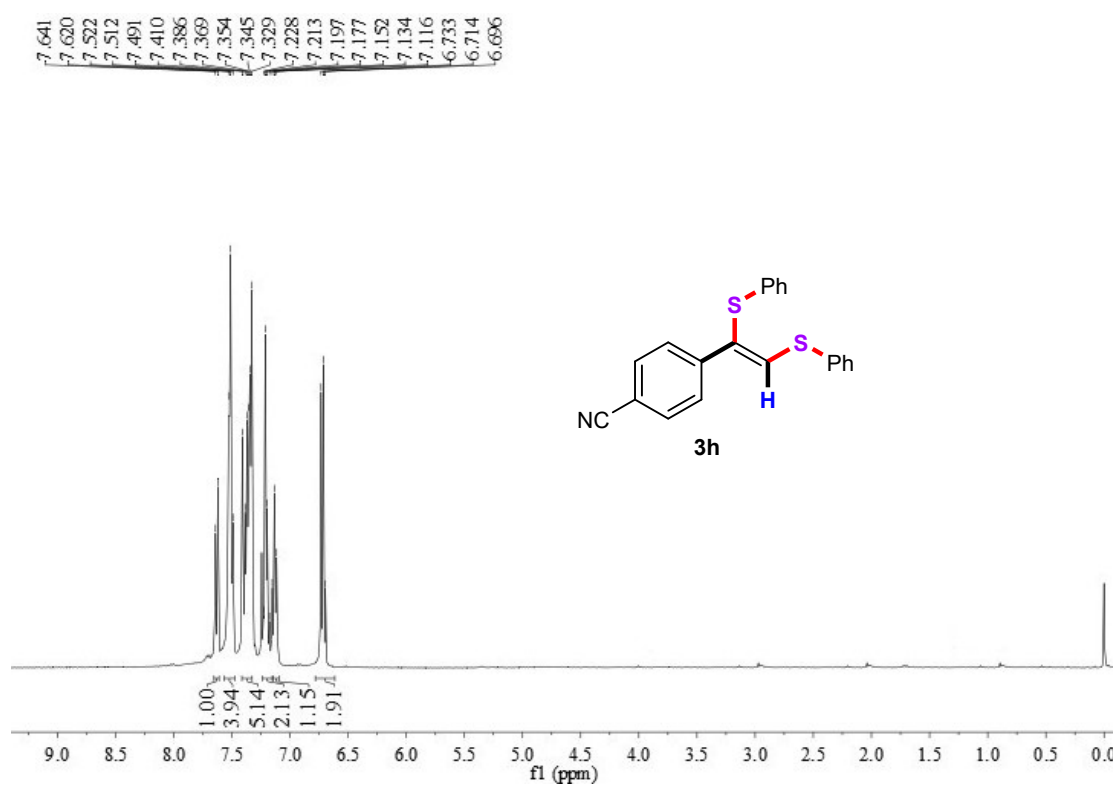



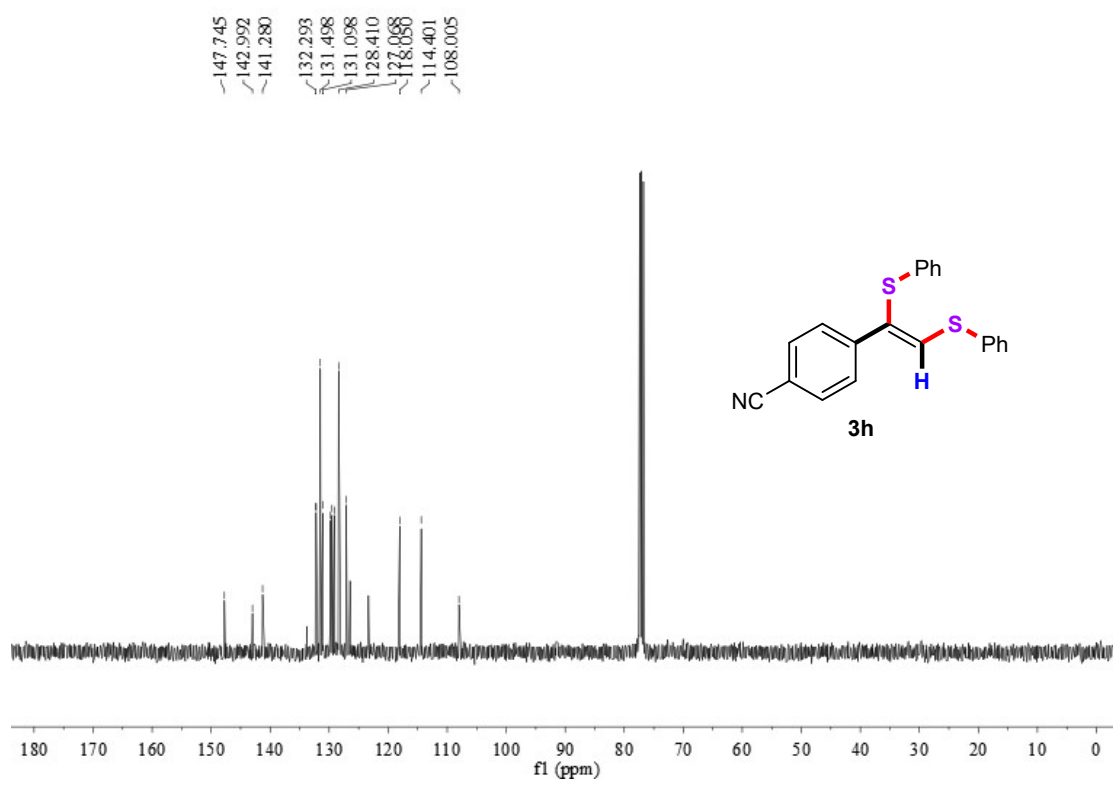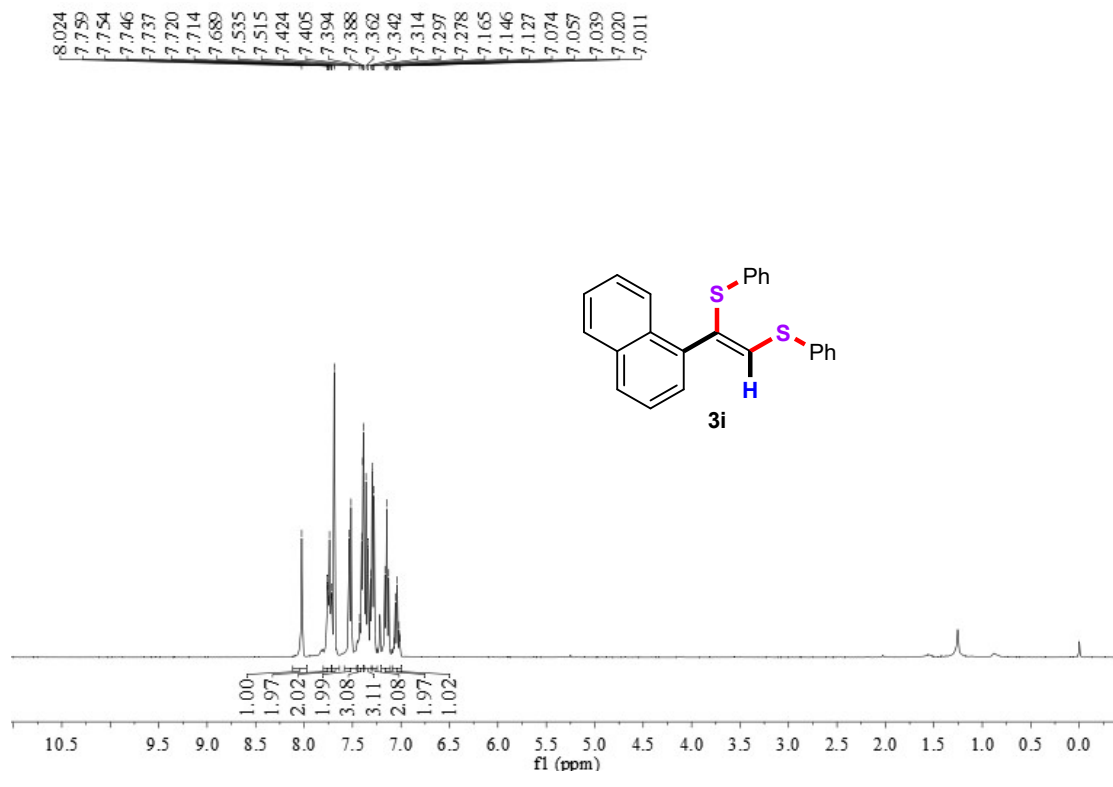

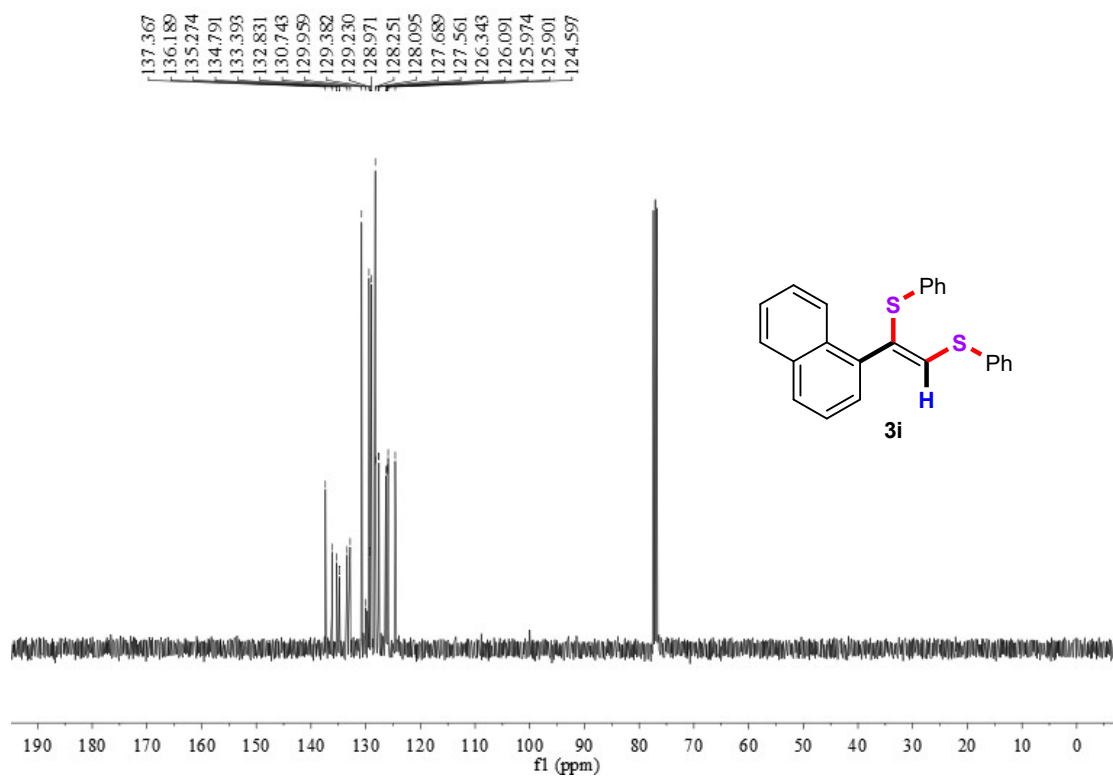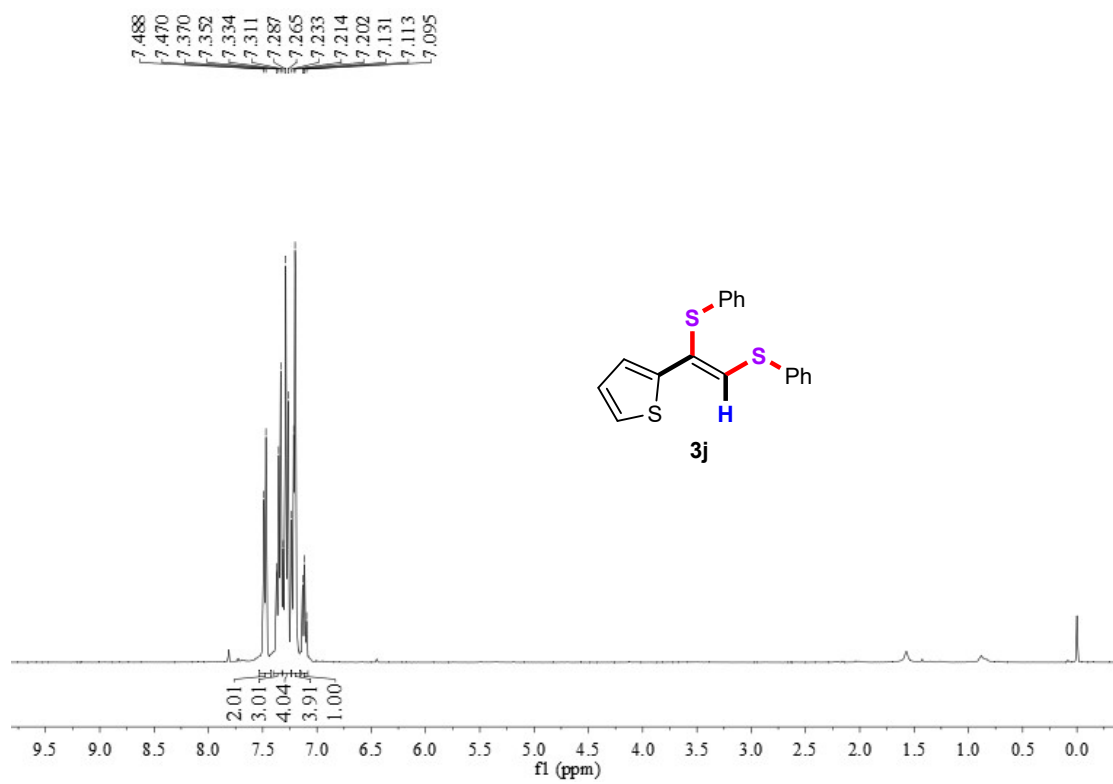

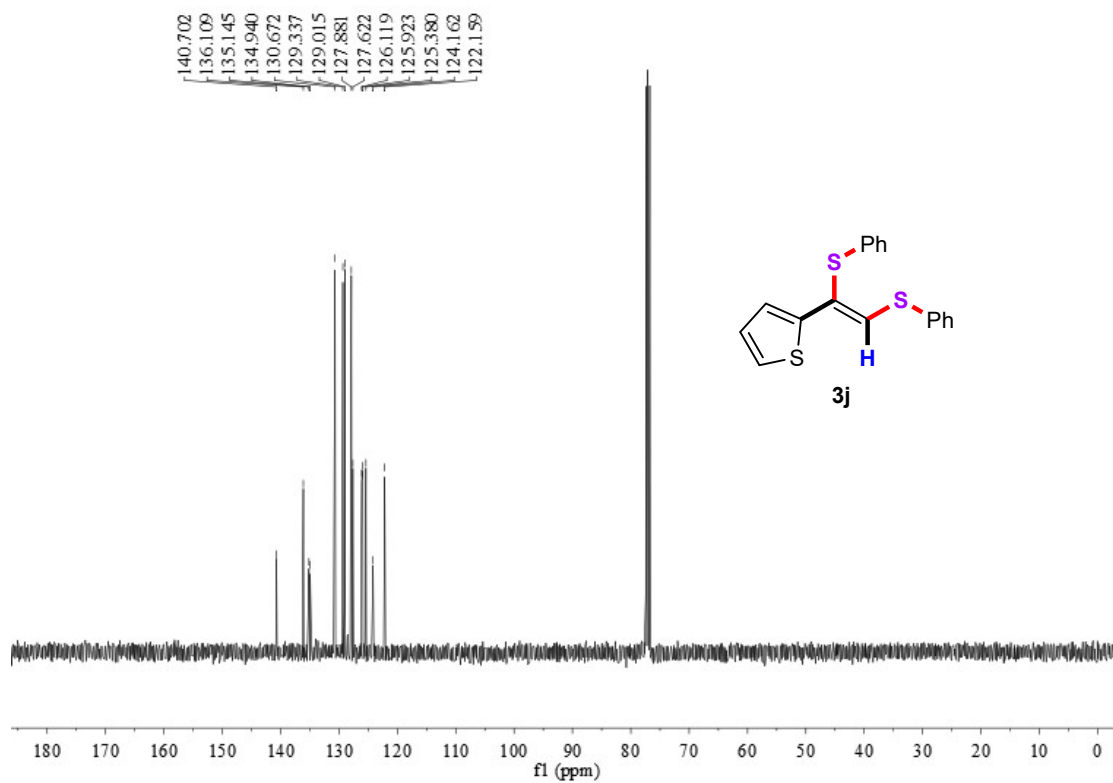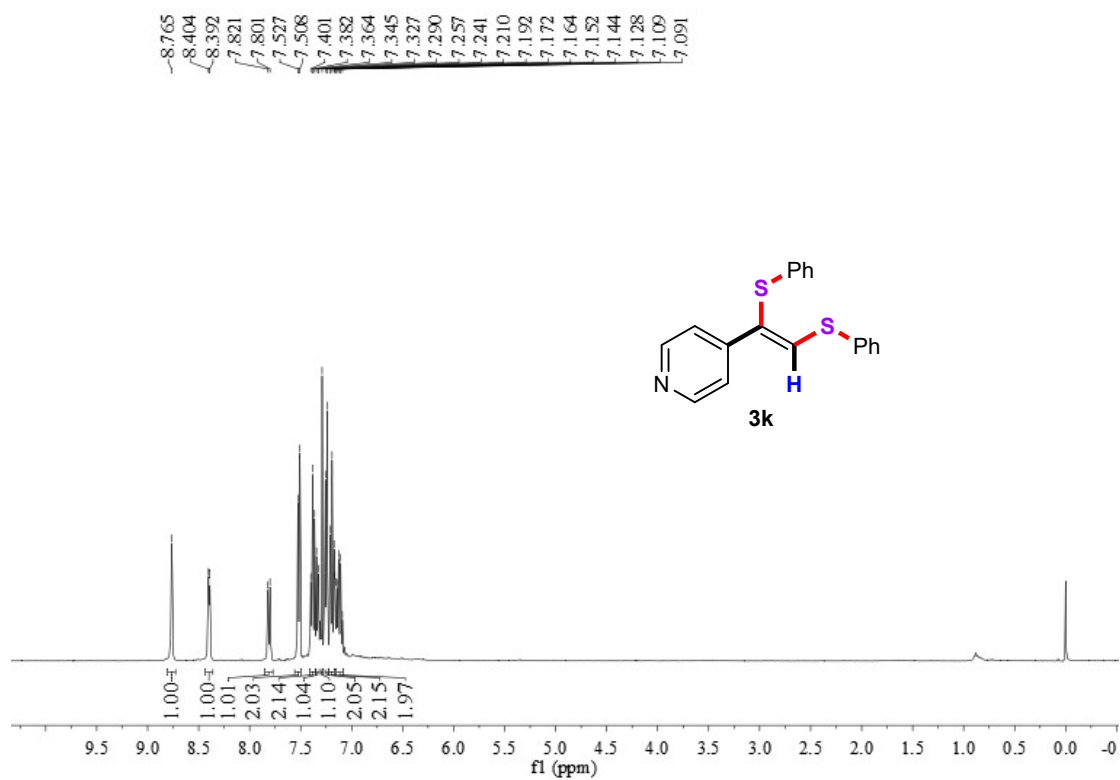

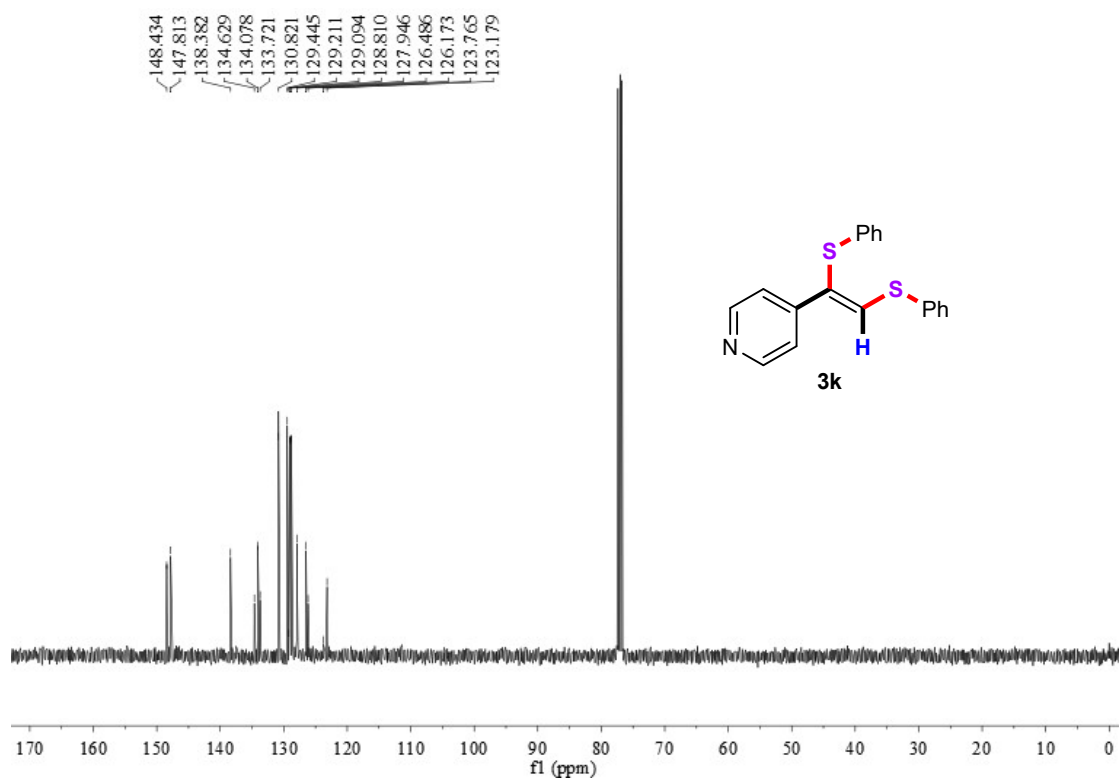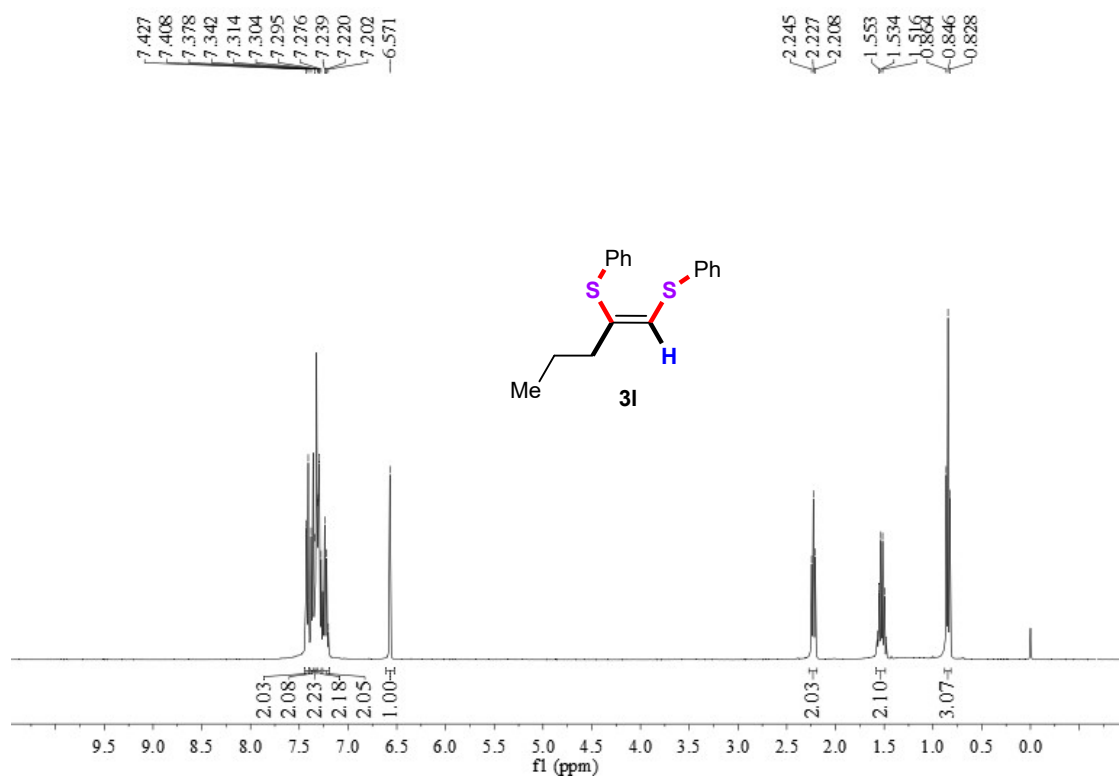

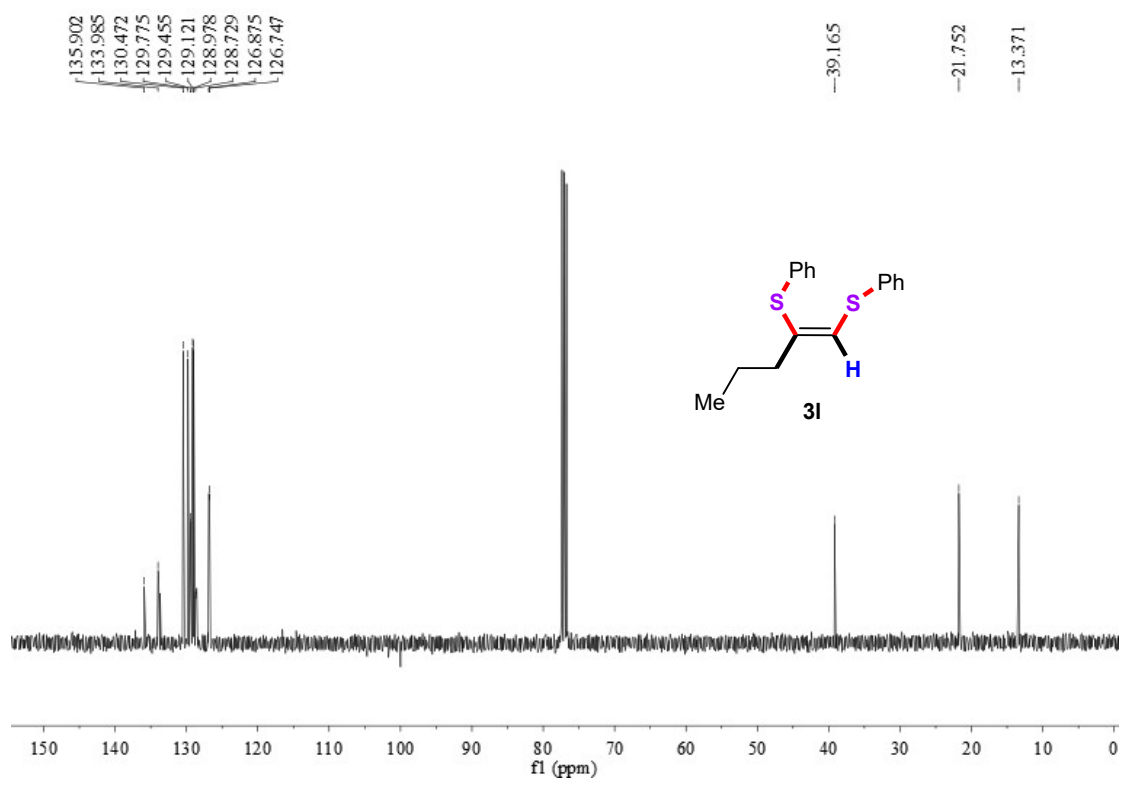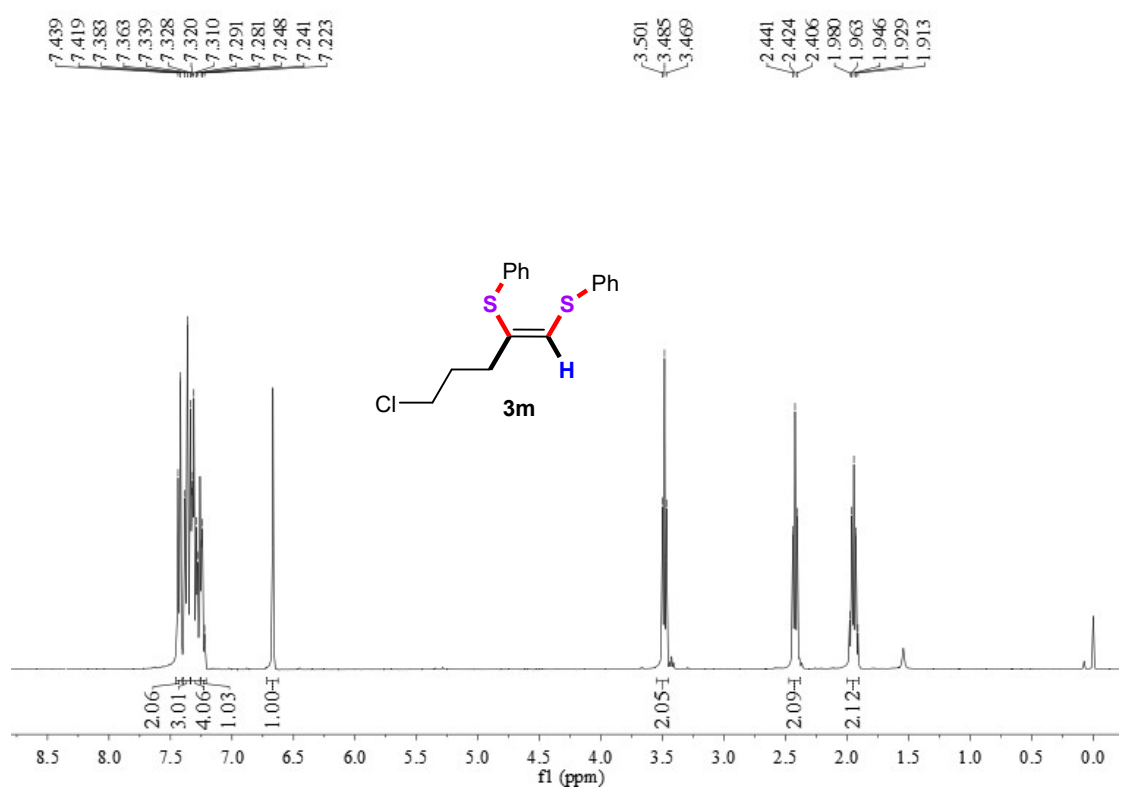

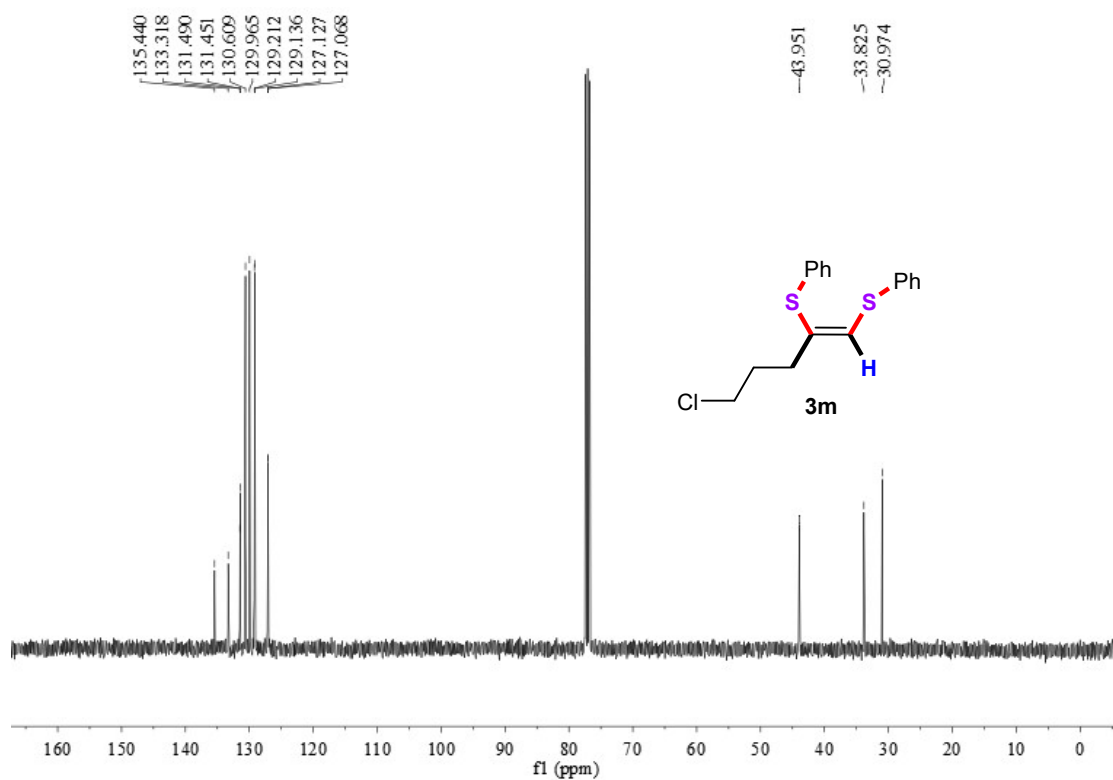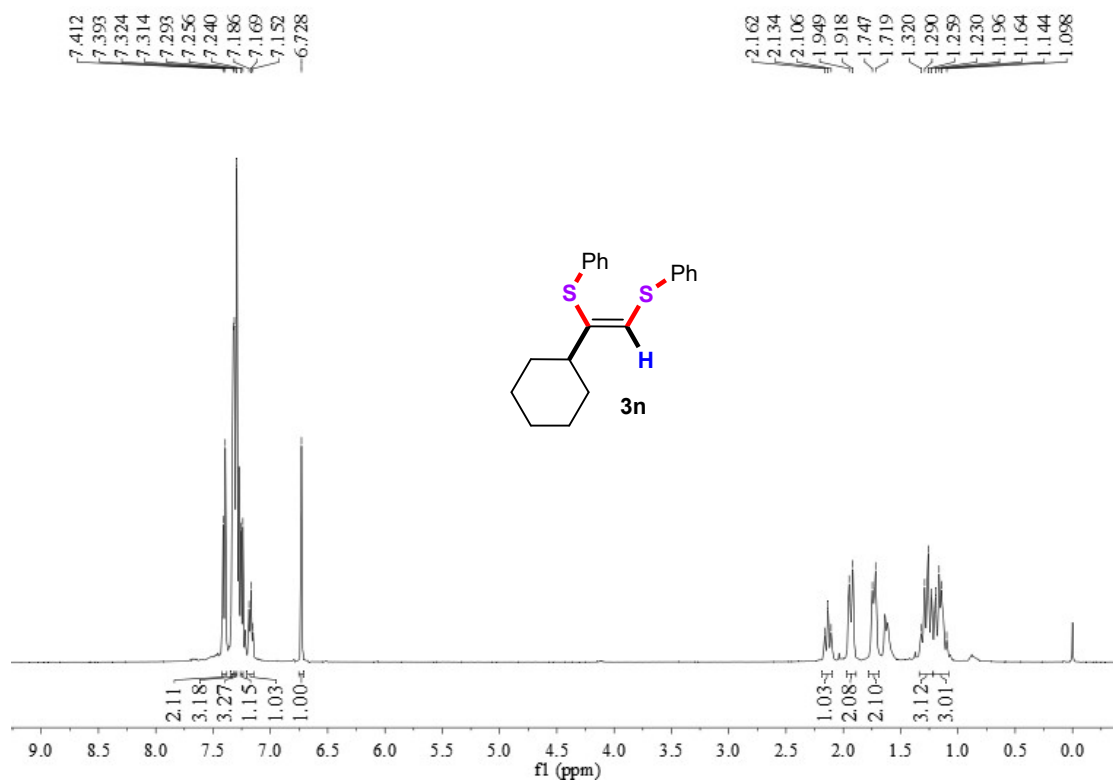

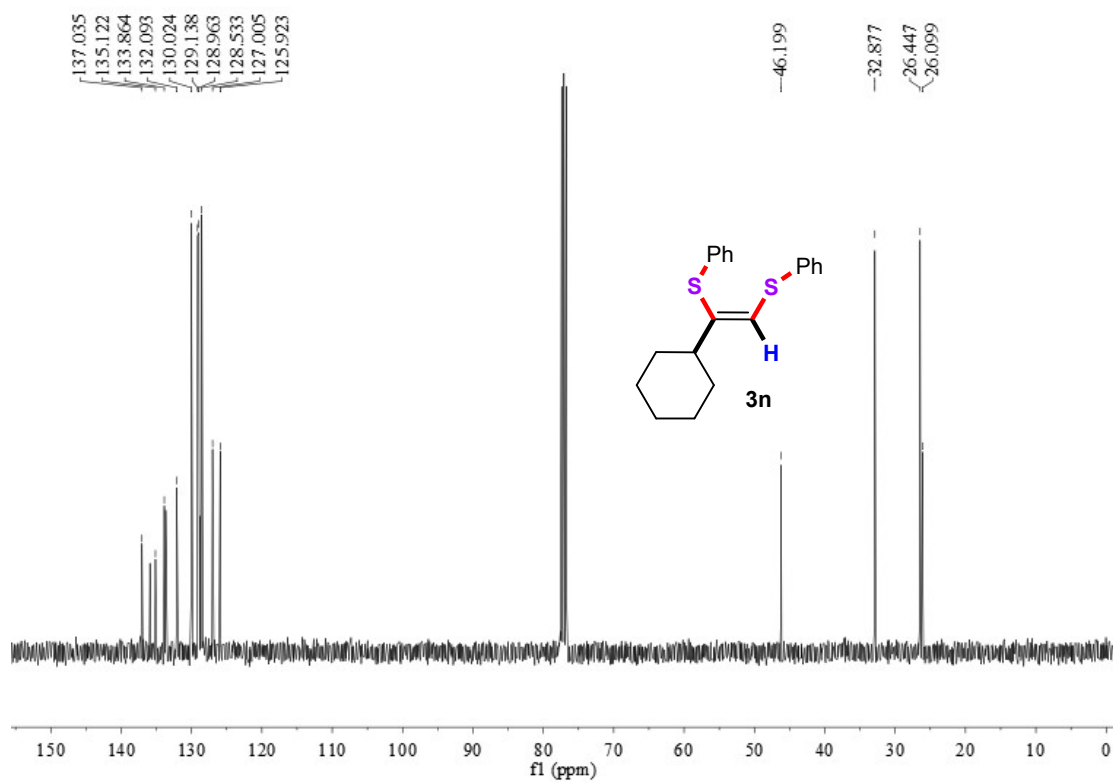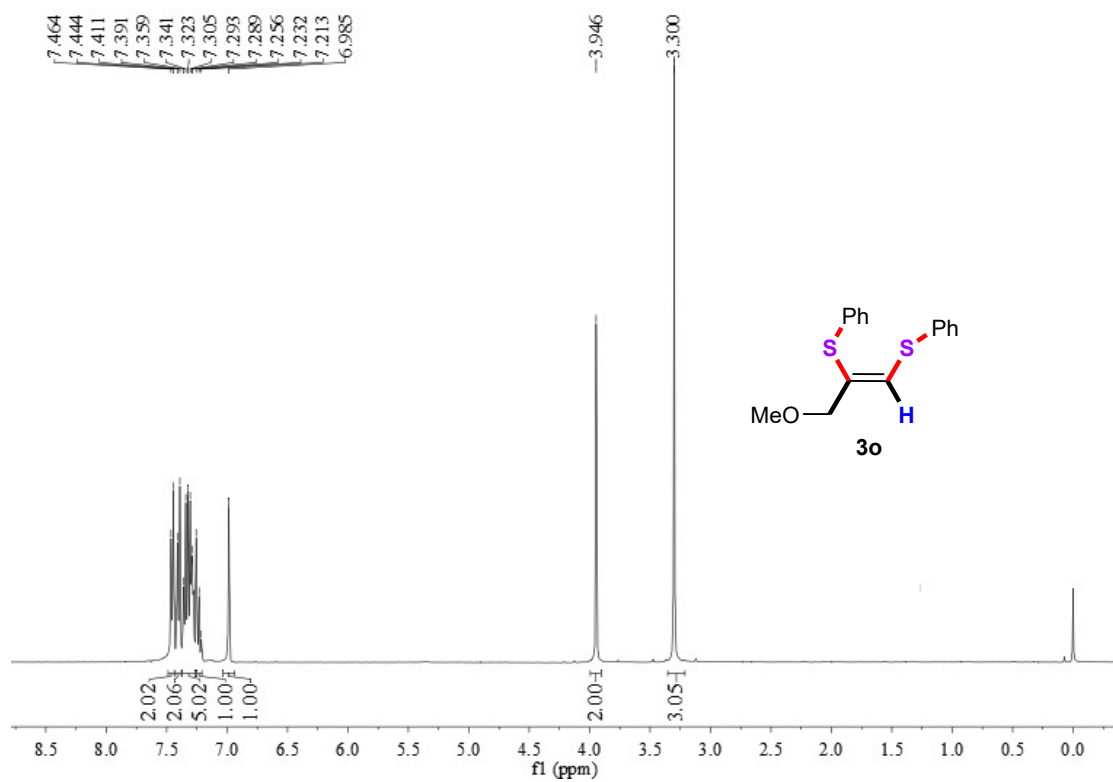

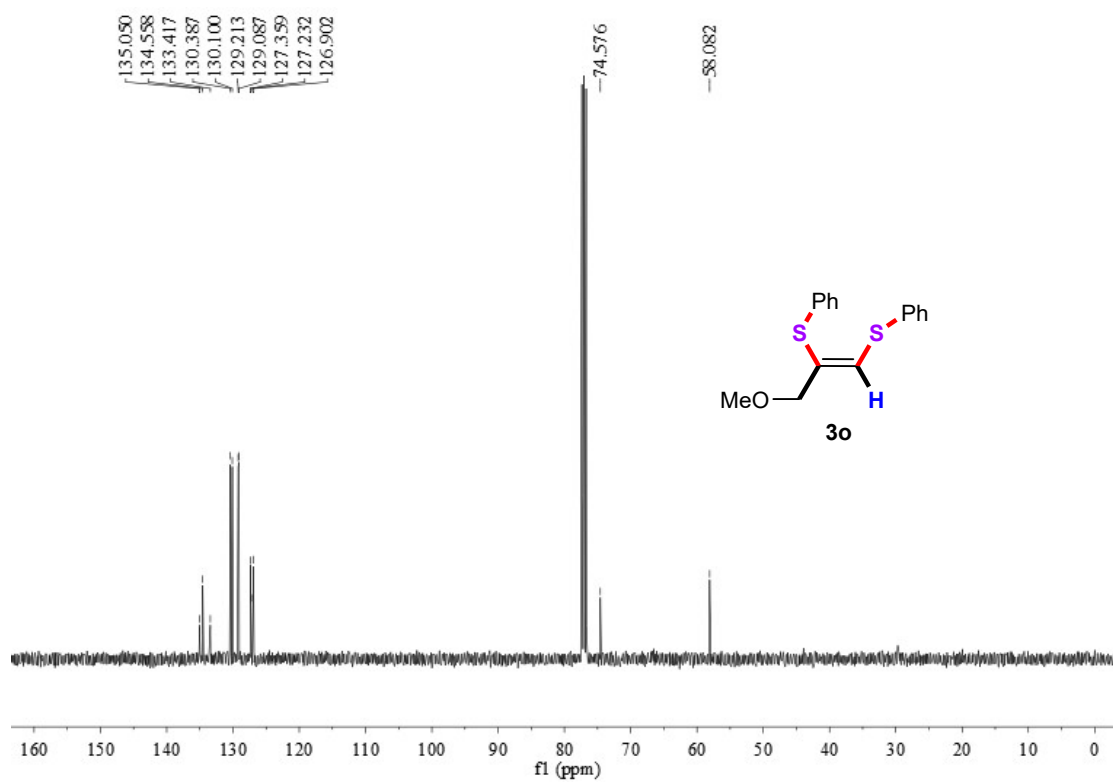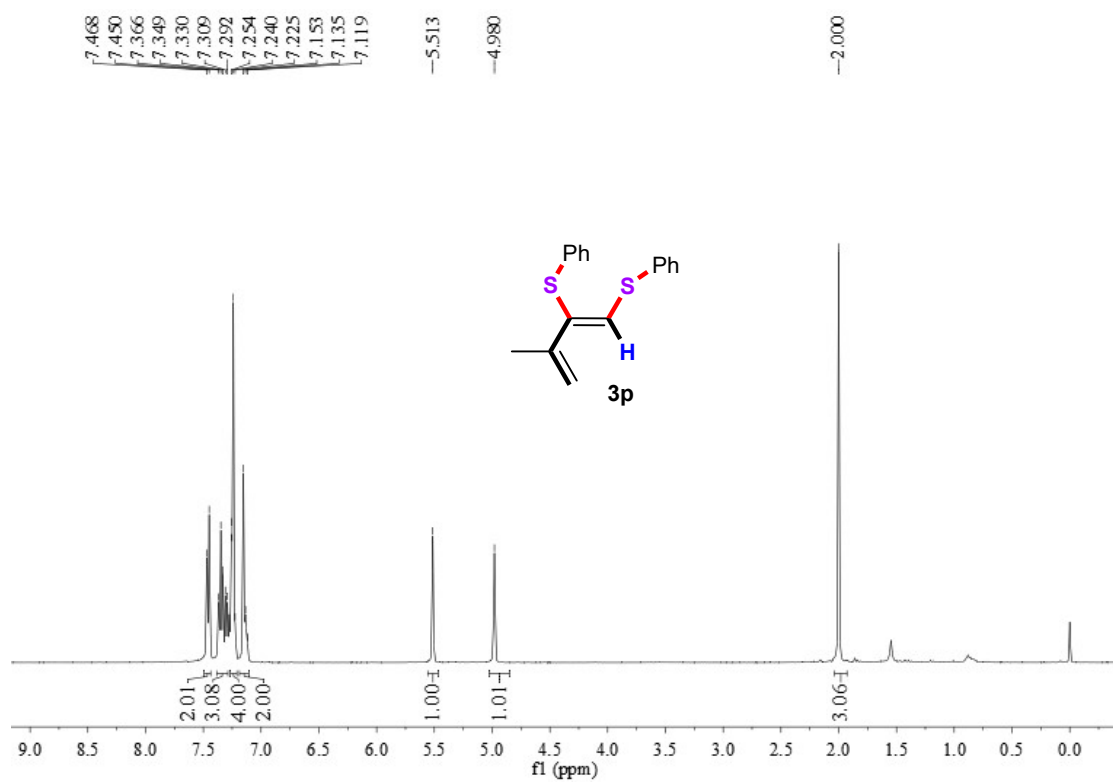



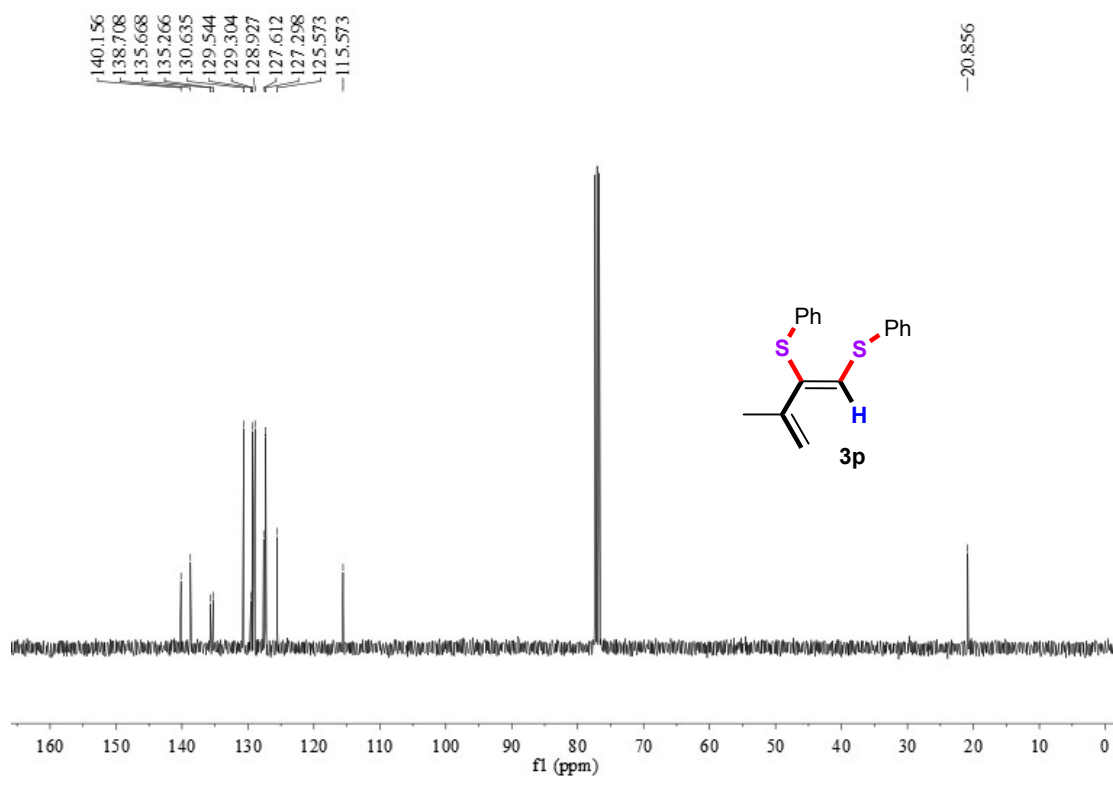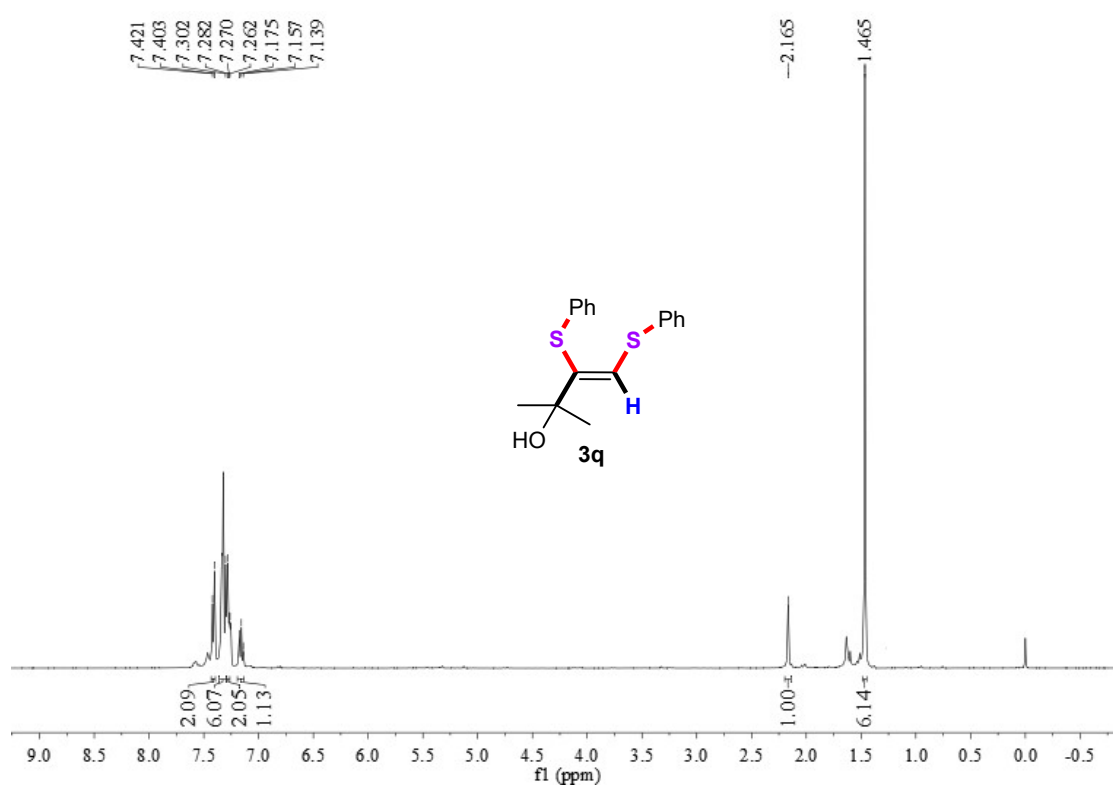

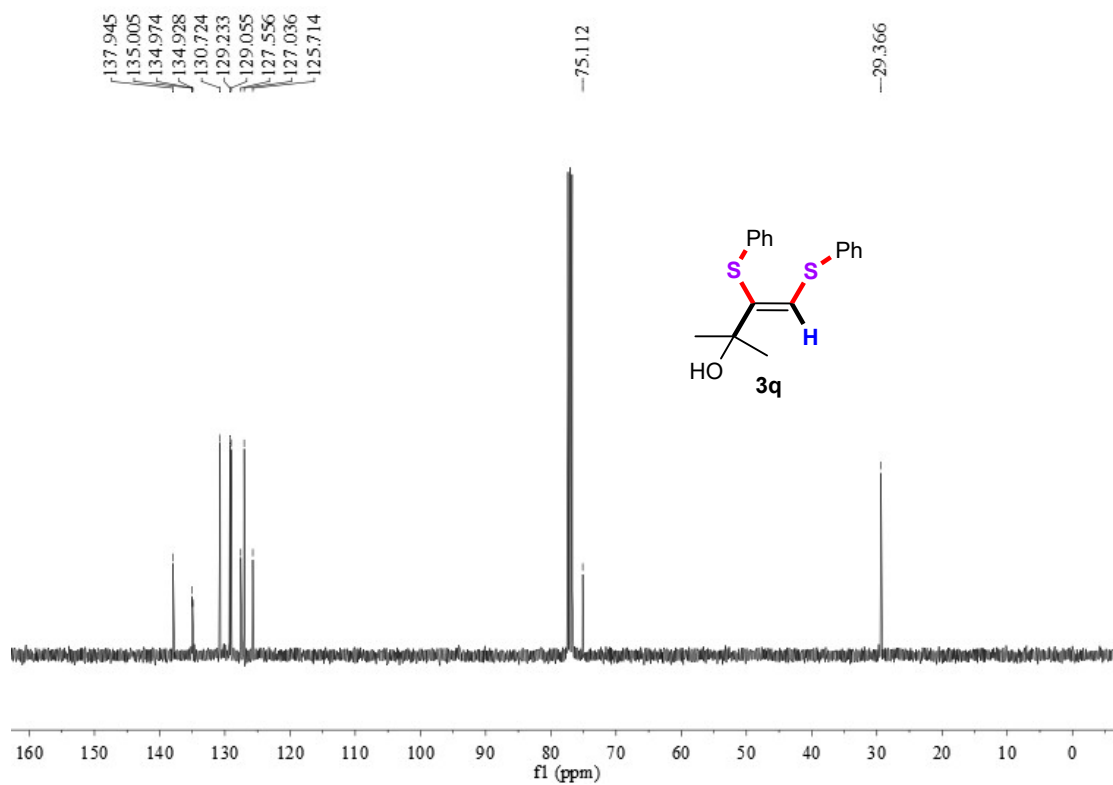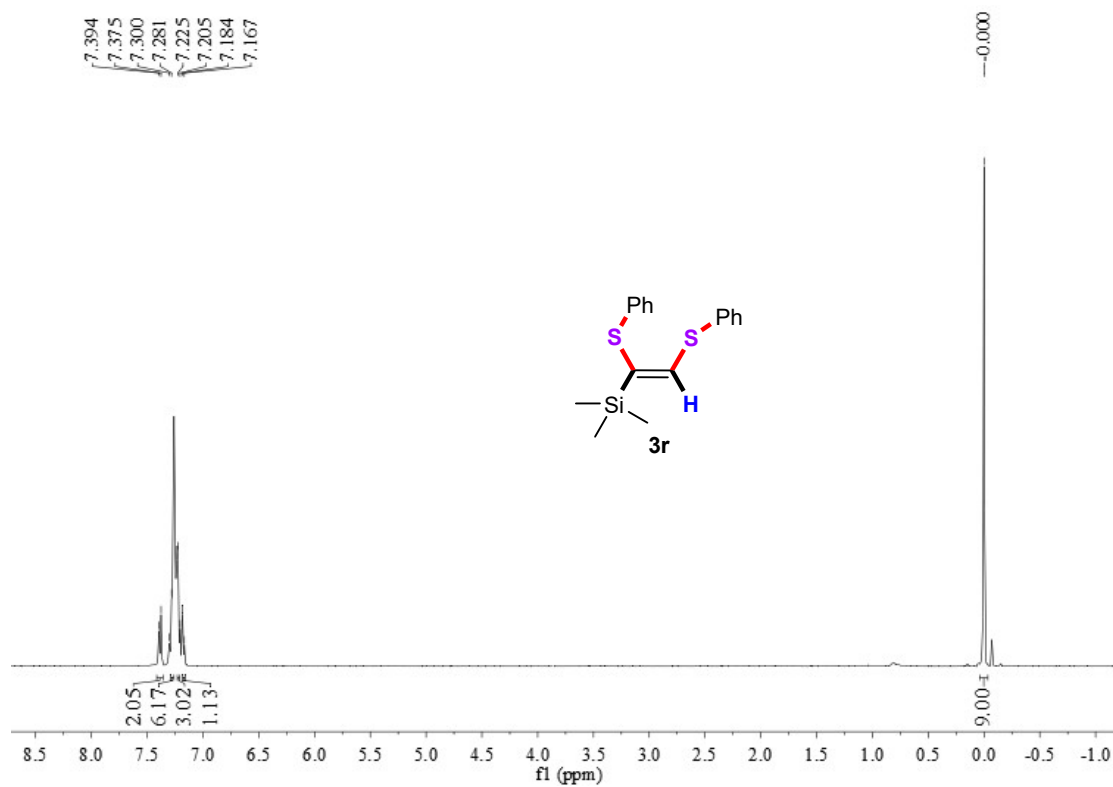

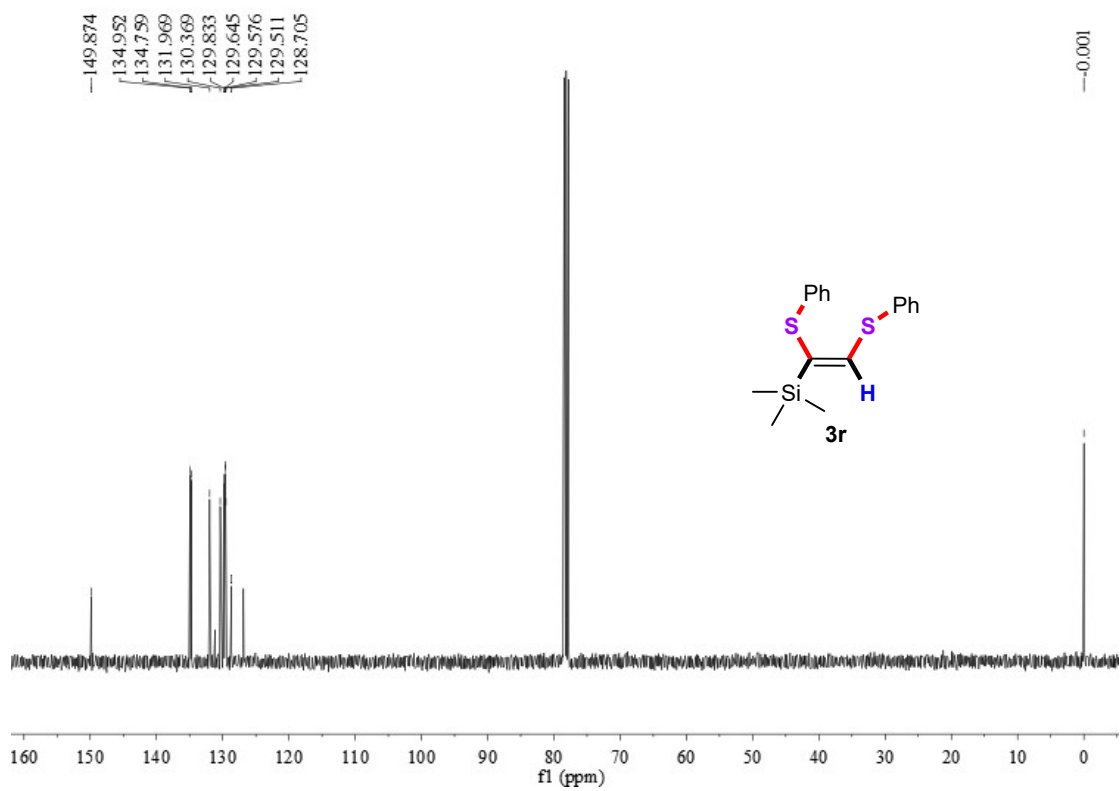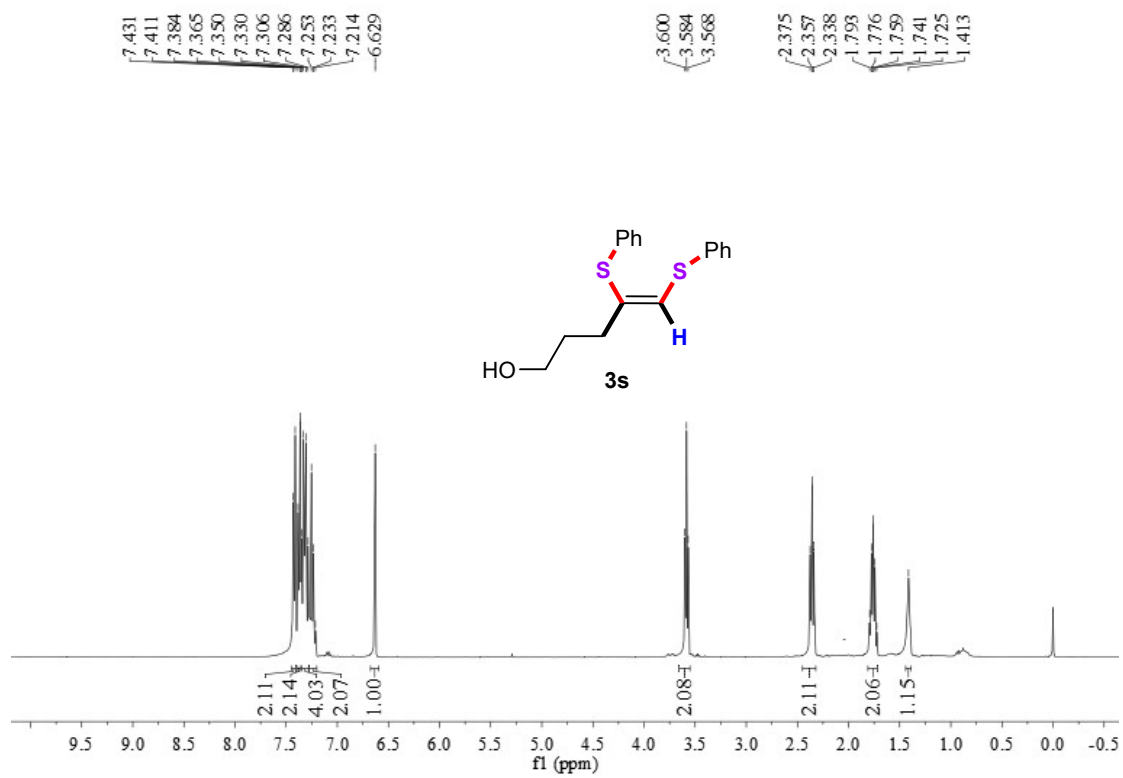

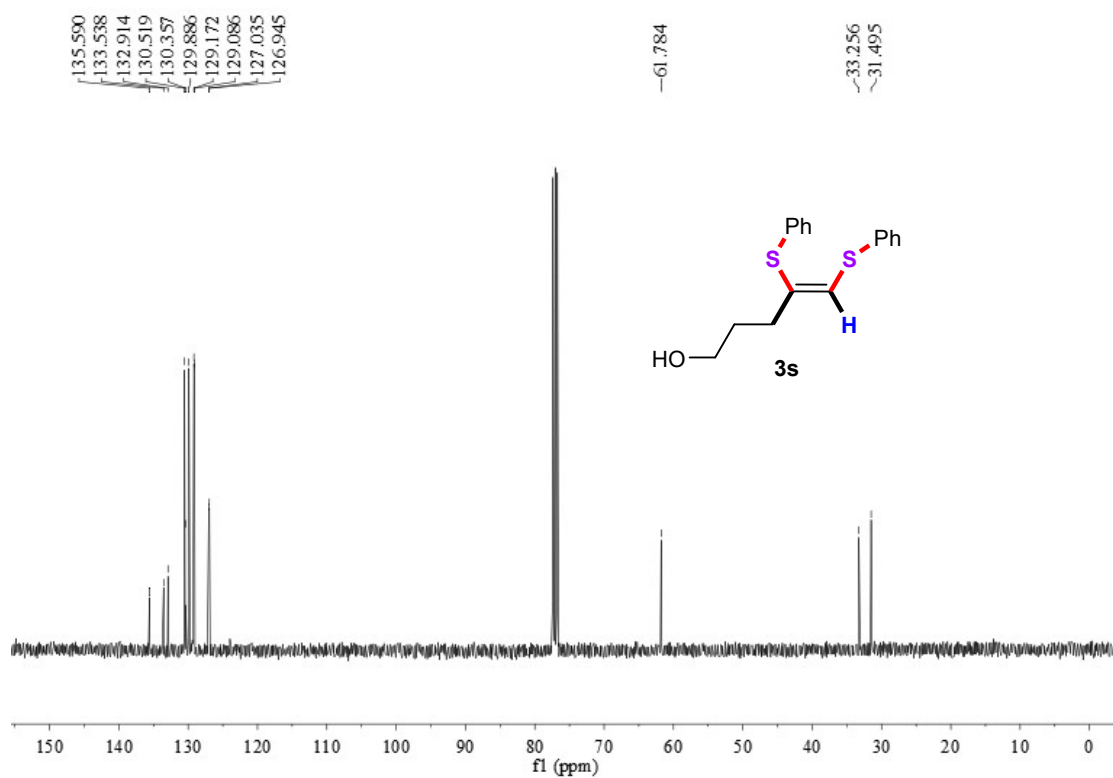

### <sup>1</sup>H and <sup>13</sup>C NMR spectra of compounds 4

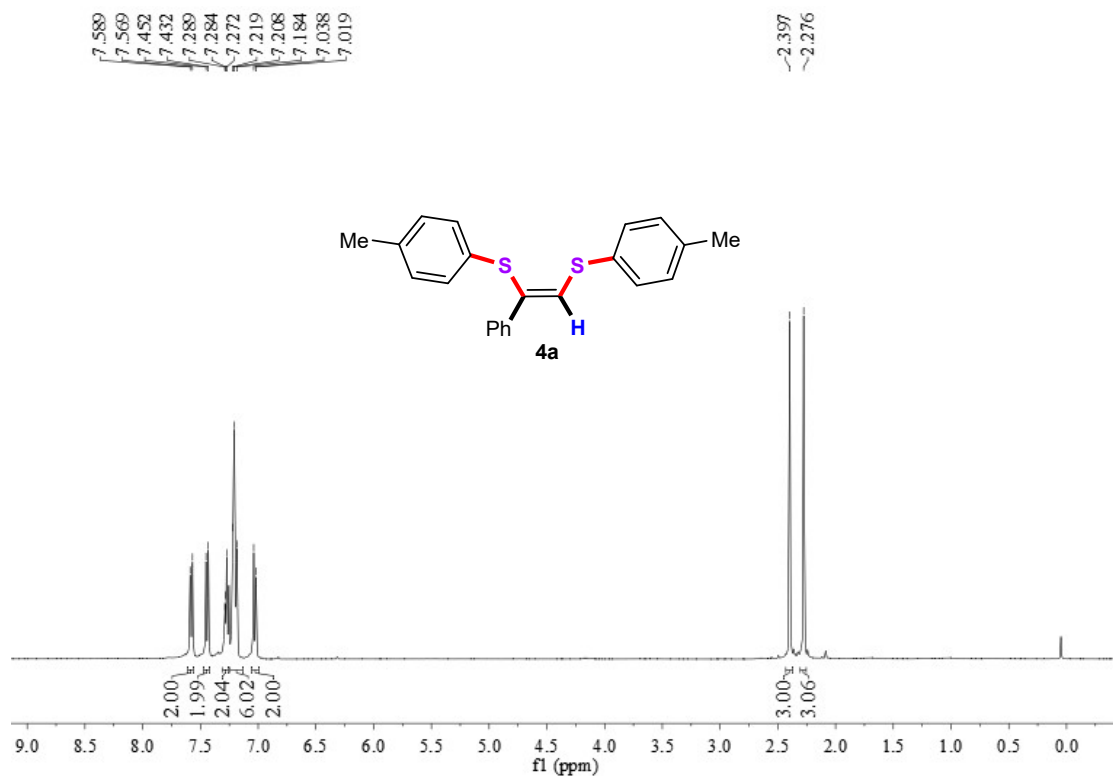

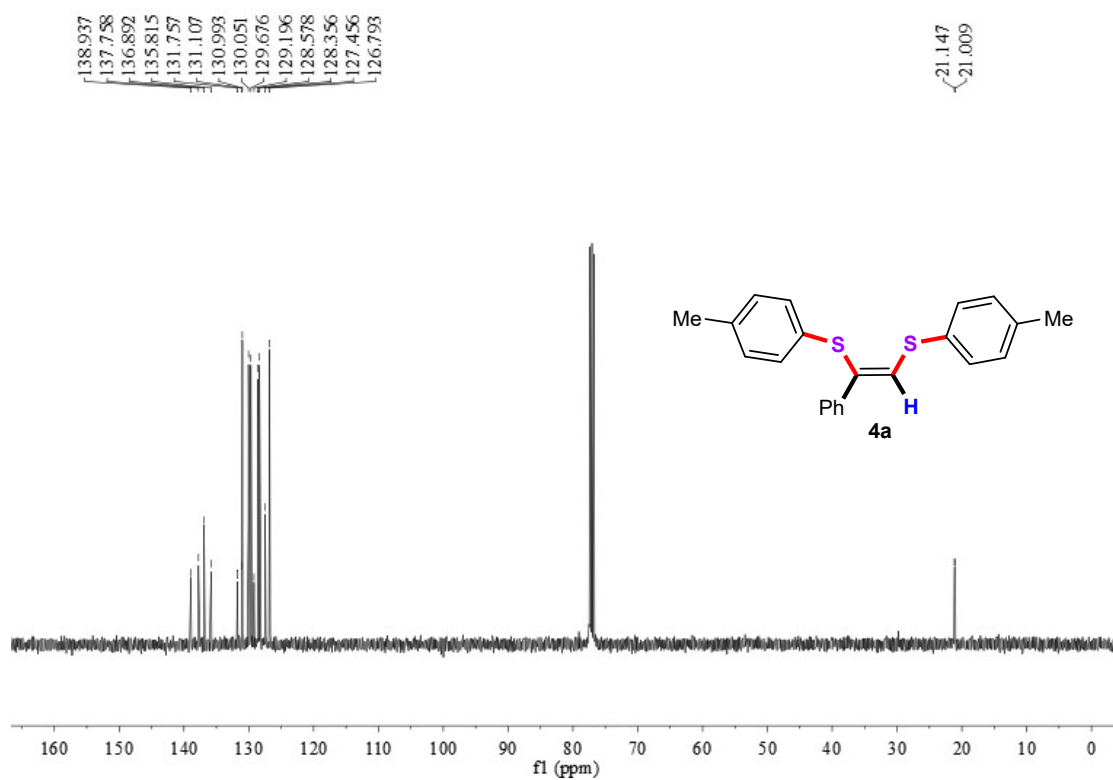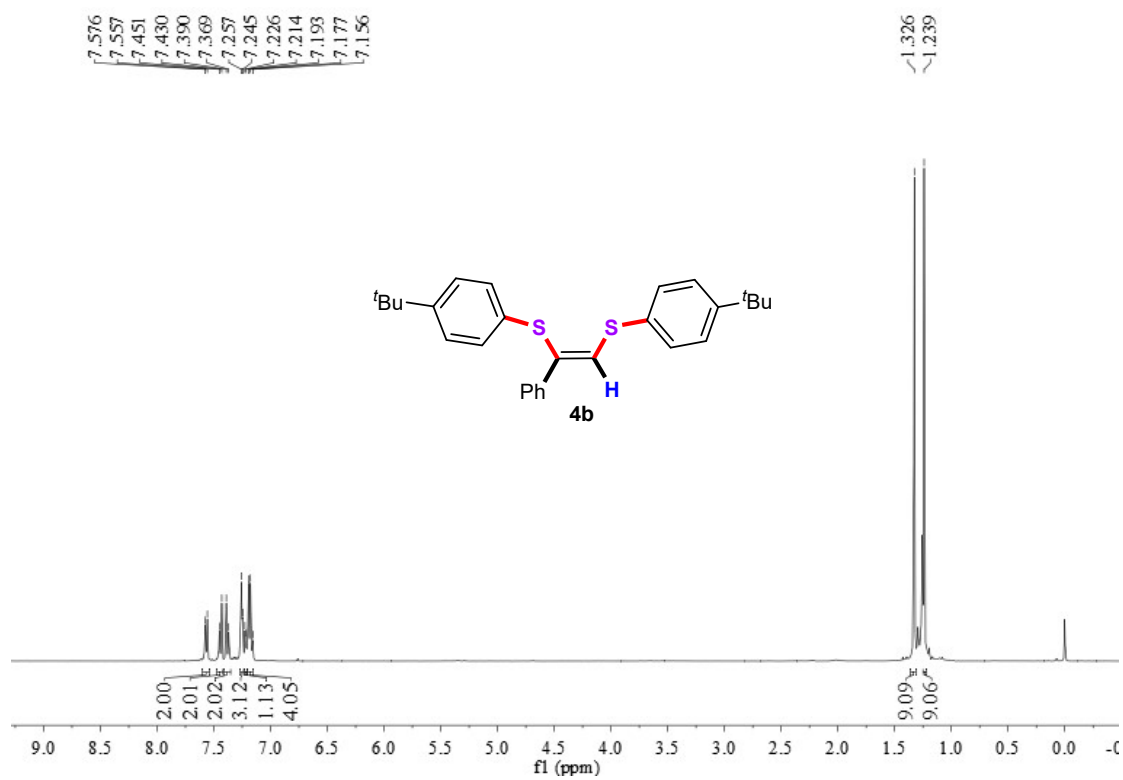

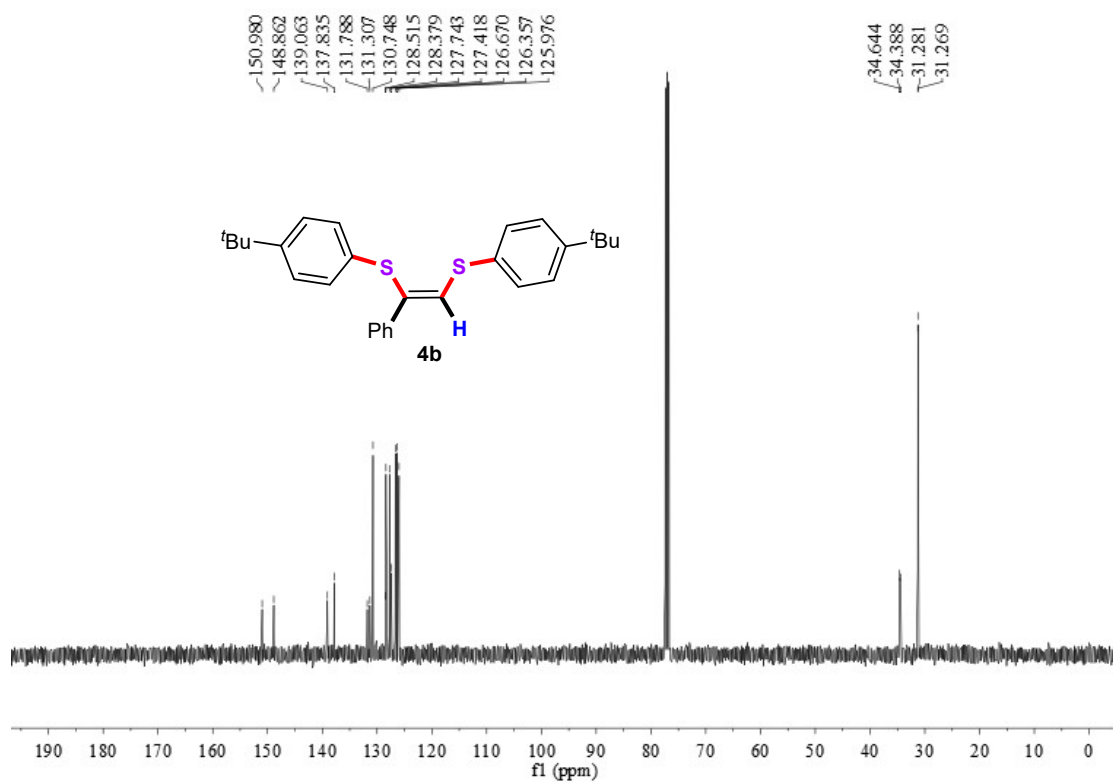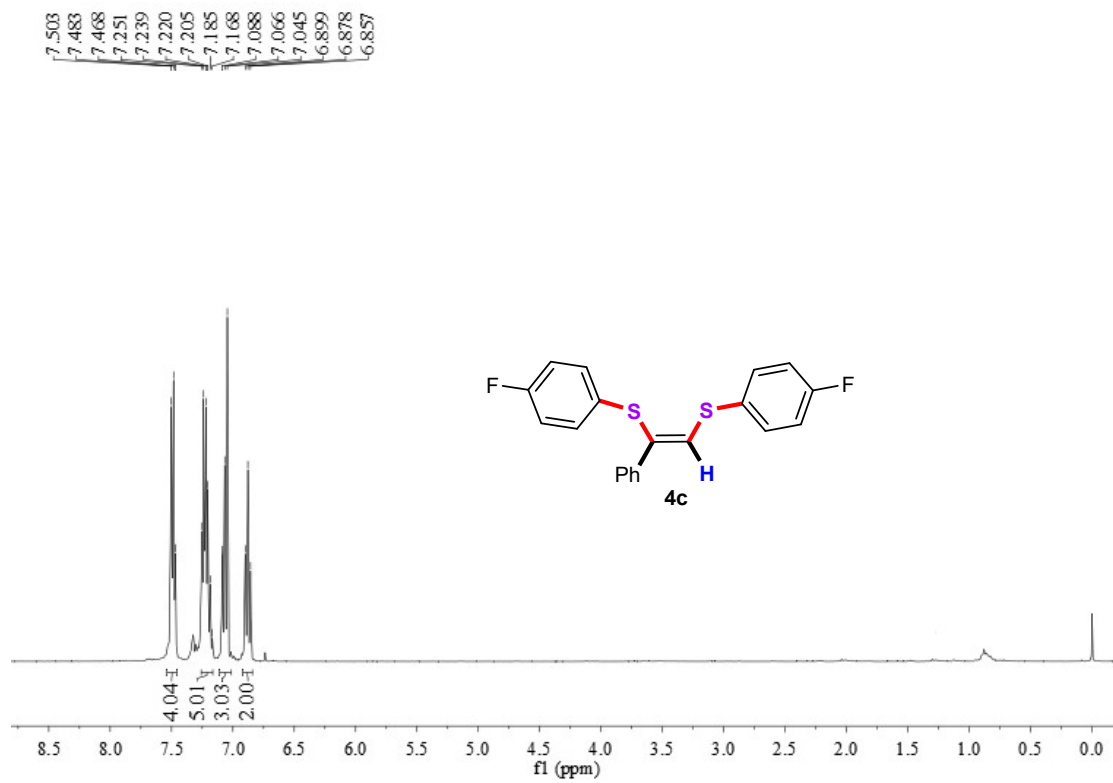

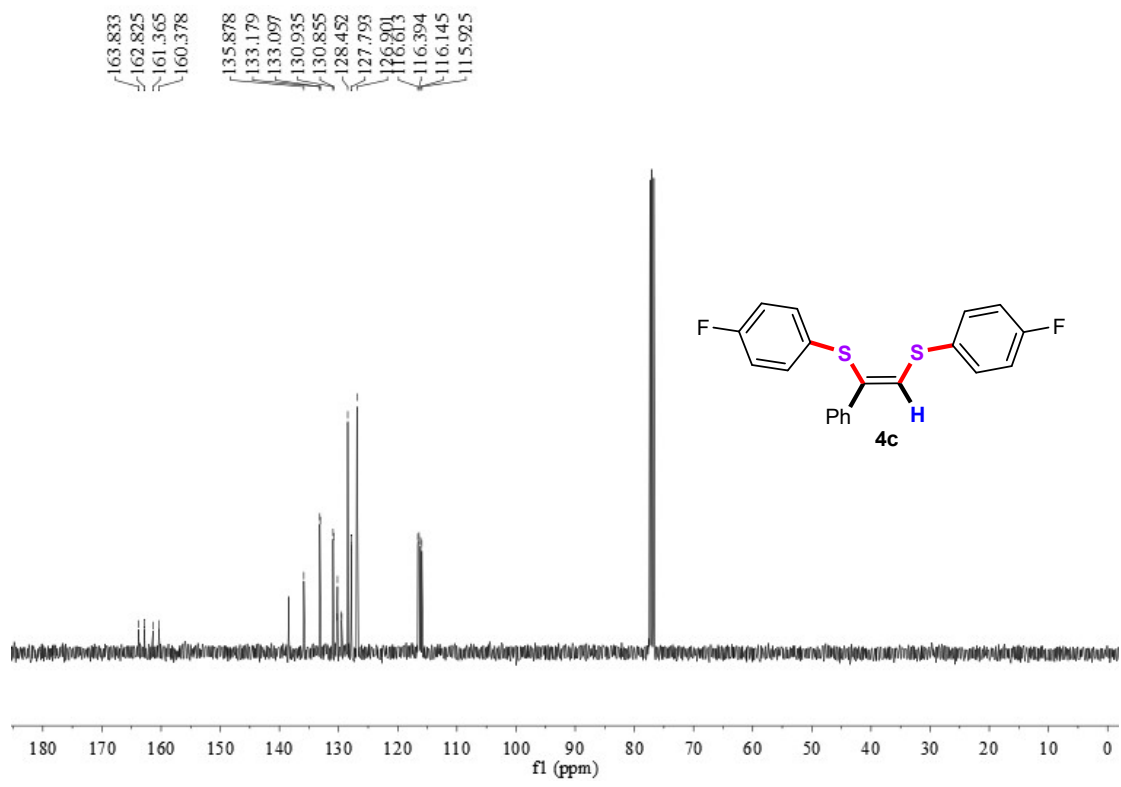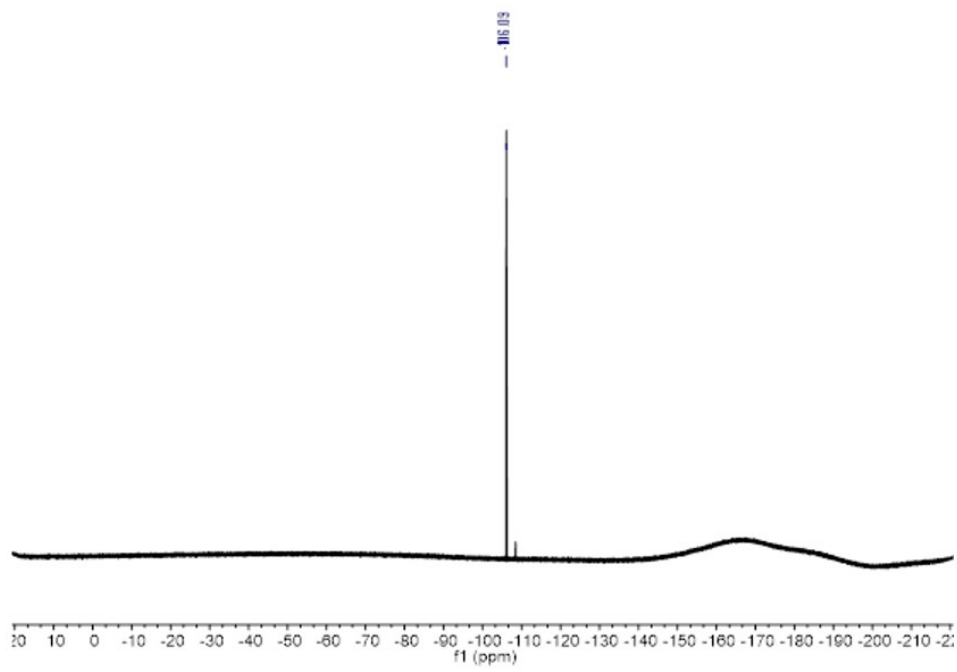

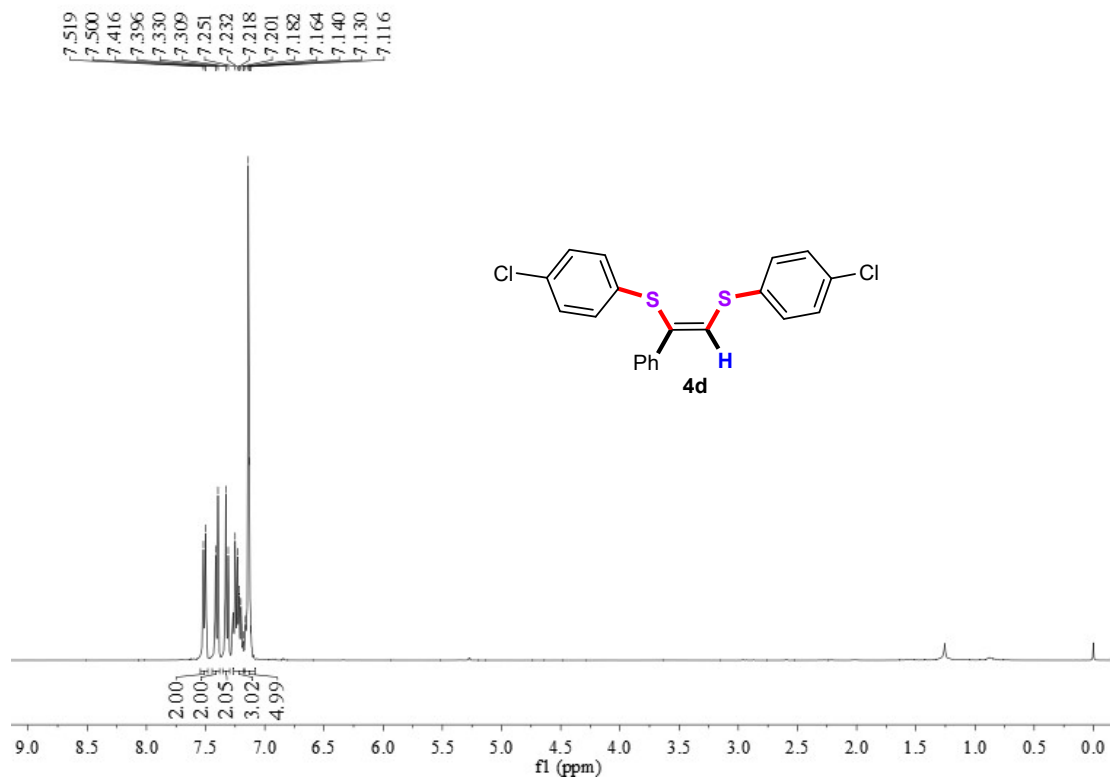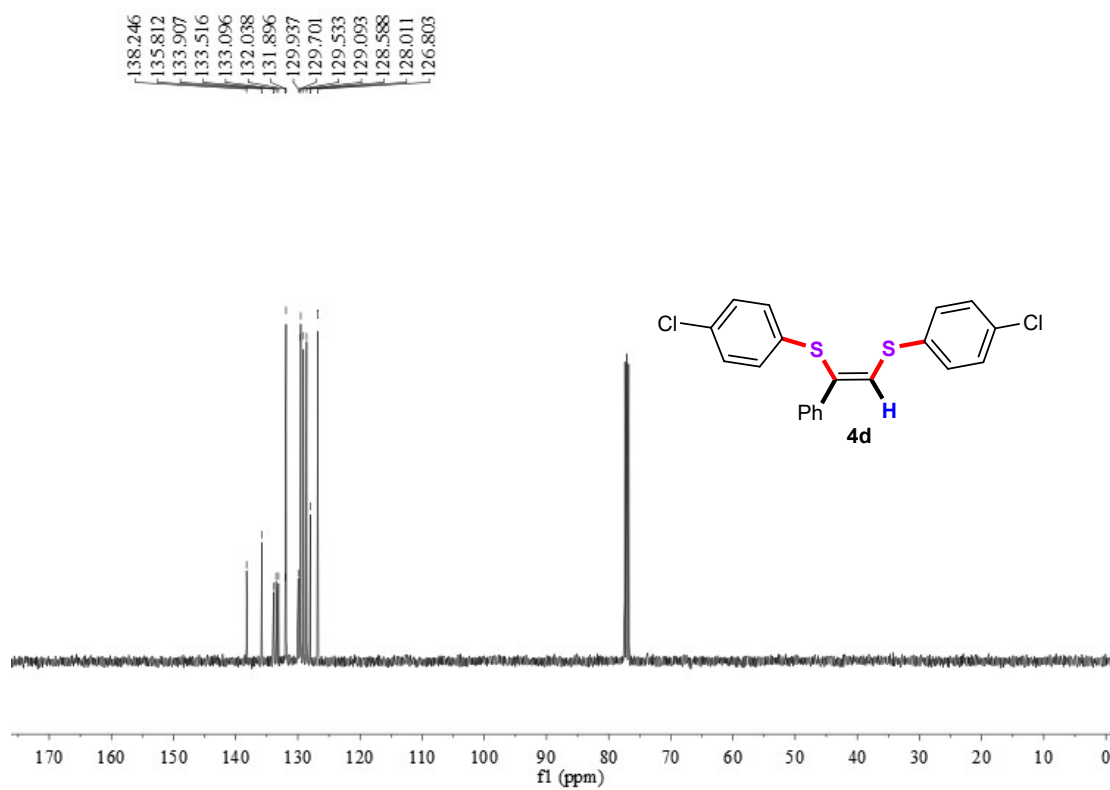



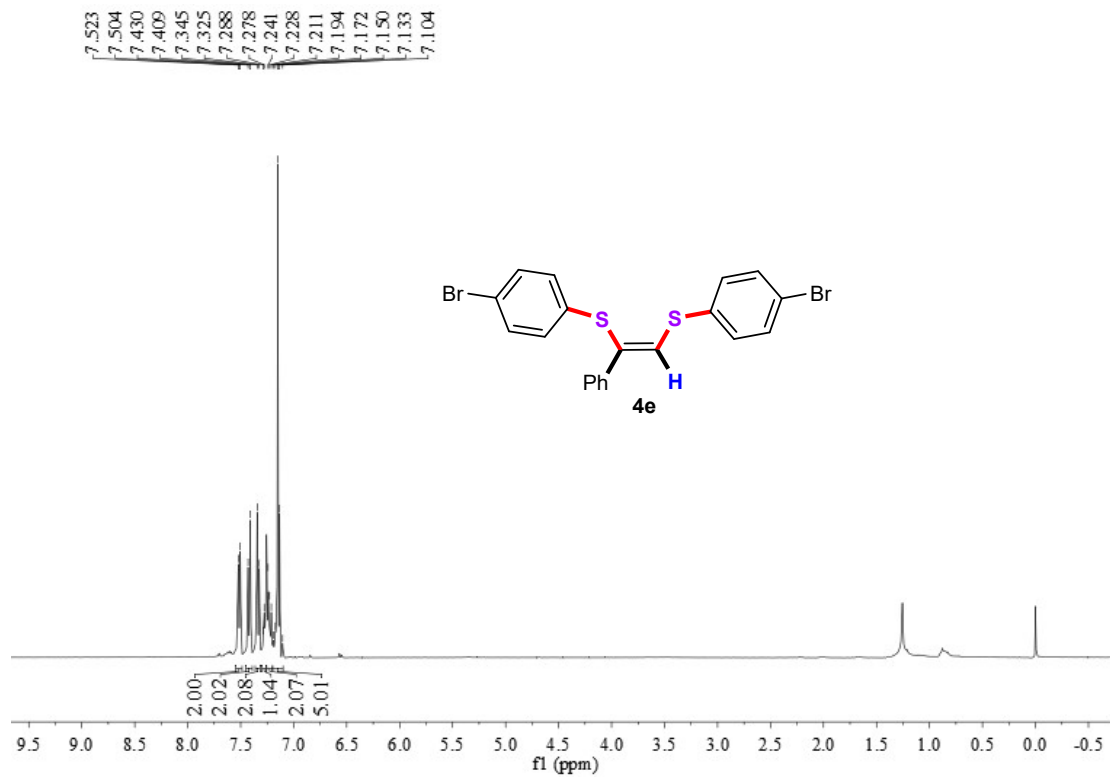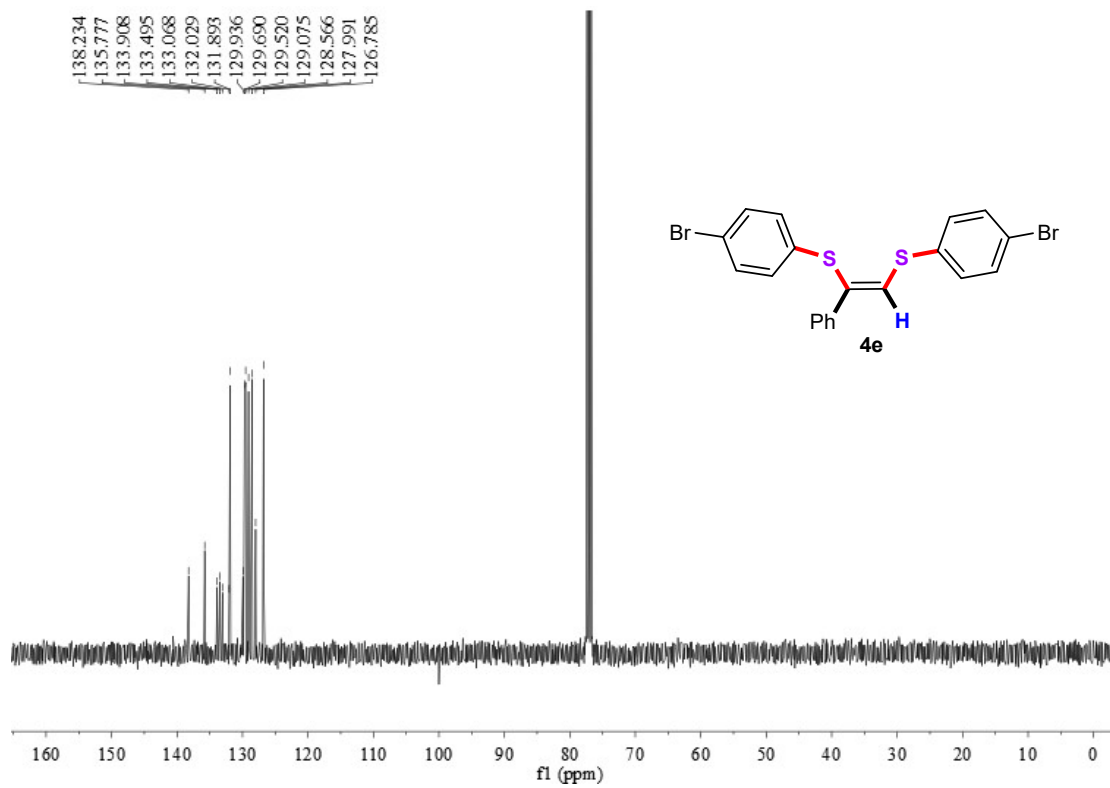

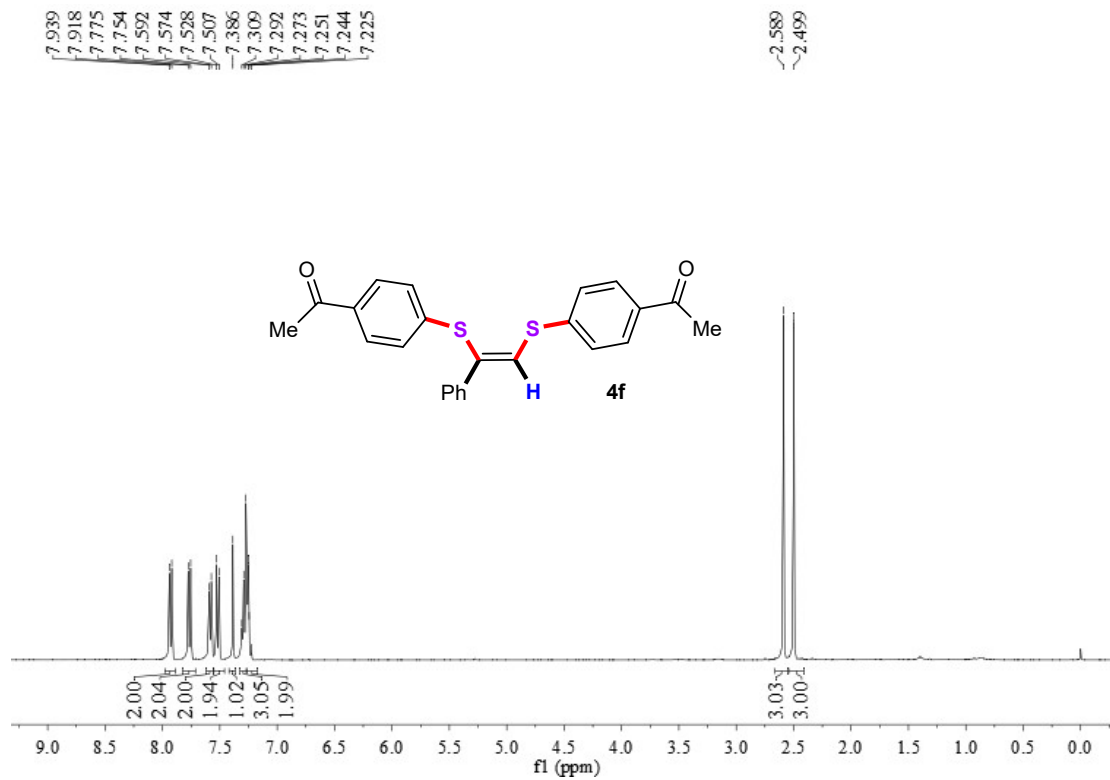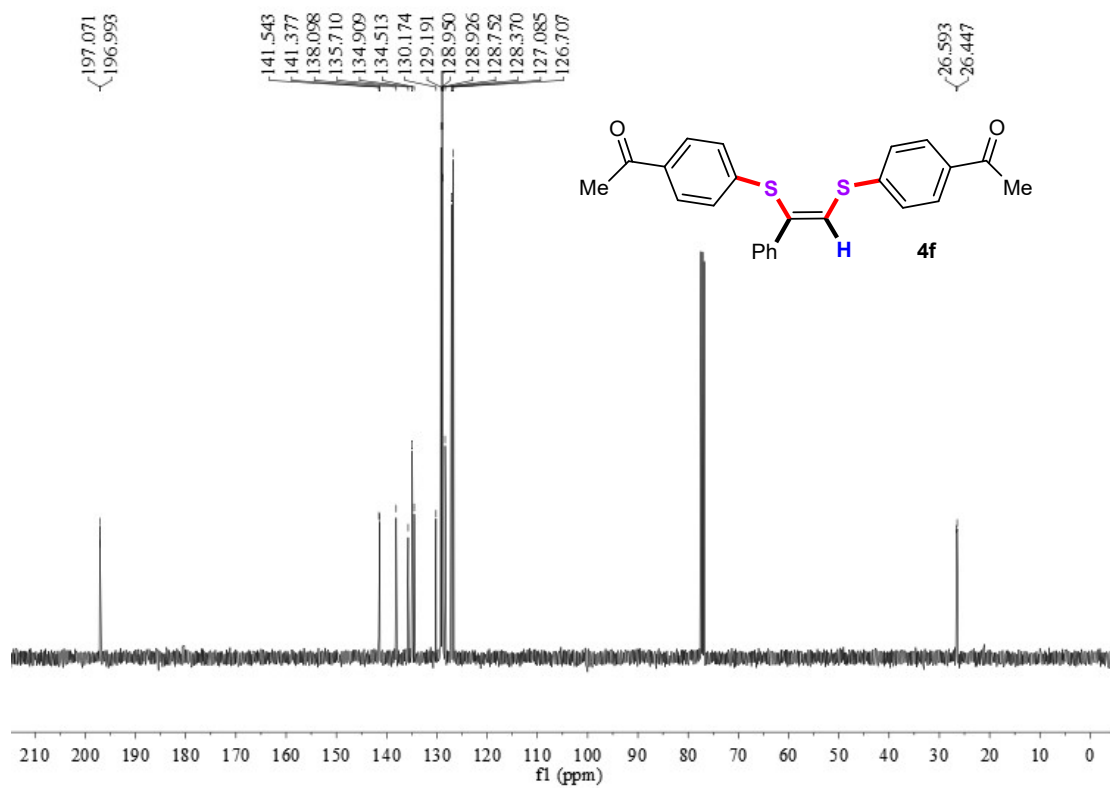

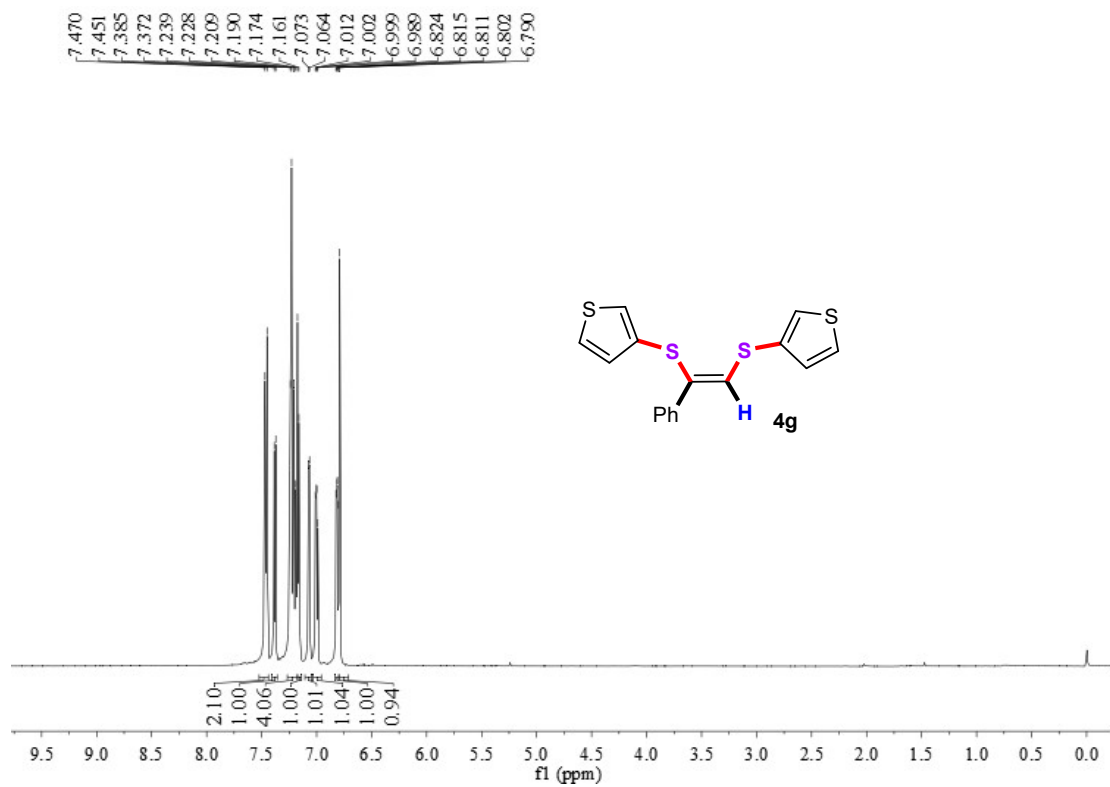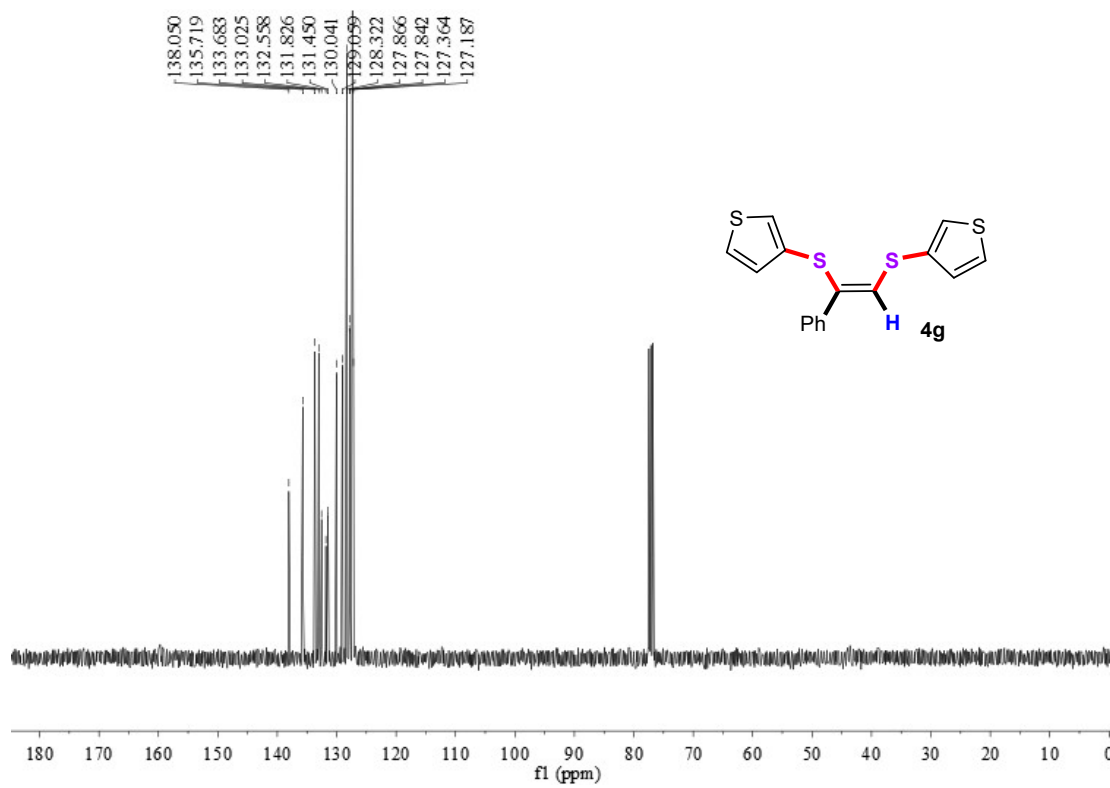

Supplement: d1ra05773a1.pdf [file d1ra05773a1.pdf]
